# Supplementary material for: A magnetic palladium nickel carbon nanocomposite as a heterogeneous catalyst for the synthesis of distyrylbenzene and biphenyl derivatives
Source: Royal Society of Chemistry journal article supplement (doi:10.1039/d1nj01762d), 2021-01-01
Supplement: d1nj01762d1.pdf [file d1nj01762d1.pdf]

# Supporting Information

## Magnetic palladium nickel carbon nano-composite as a heterogeneous catalyst for the synthesis of distyrylbenzene and biphenyl derivatives

Habiballah Shafie,<sup>a</sup> Khodabakhsh Niknam,<sup>\*,a</sup>

<sup>a</sup>Department of Chemistry, Faculty of Nano and Bio Science and Technology, Persian Gulf University, Bushehr 75169 Iran, Tel.: +98 77 33441494, Fax: +98 77 33445188

\*Corresponding author. E-mail: niknam@pgu.ac.ir

### Experimental Section

**General:** Chemicals were purchased from Fluka, Merck and Aldrich Chemical Companies. The products were characterized by comparison of their spectral and physical data with those reported in literature. For recorded <sup>1</sup>H-NMR spectra we were using Bruker Avance (300 MHz or DRX 500 MHz) or Bruker Ultrashield (400 MHz) in pure deuterated CDCl<sub>3</sub> solvent with tetramethylsilane (TMS) as internal standards. X-ray diffraction (XRD, D8, Advance, Bruker, axs), FT-IR spectroscopy (Shimadzu FT-IR 8000 spectrophotometer), and SEM instrumentation (SEM, XL-30 FEG SEM, Philips, at 20 kV) were employed for characterization of catalysts. Surface spectroscopy analyses of the catalysts were performed in an ESCA/AES system. This system is equipped with a concentric hemispherical (CHA) electron energy analyzer (Specs model EA10 plus) suitable for X-ray photoelectron spectroscopy (XPS). Melting points determined in open capillary tubes in a Barnstead Electrothermal 9100 BZ circulating oil melting point apparatus. The reaction monitoring was accomplished by TLC on silica gel PolyGram SILG/UV254 plates. Column chromatography was carried out on columns of silica gel 60 (70–230 mesh). All the products were characterized with IR, NMR and the known compounds compared with those reported in literature.

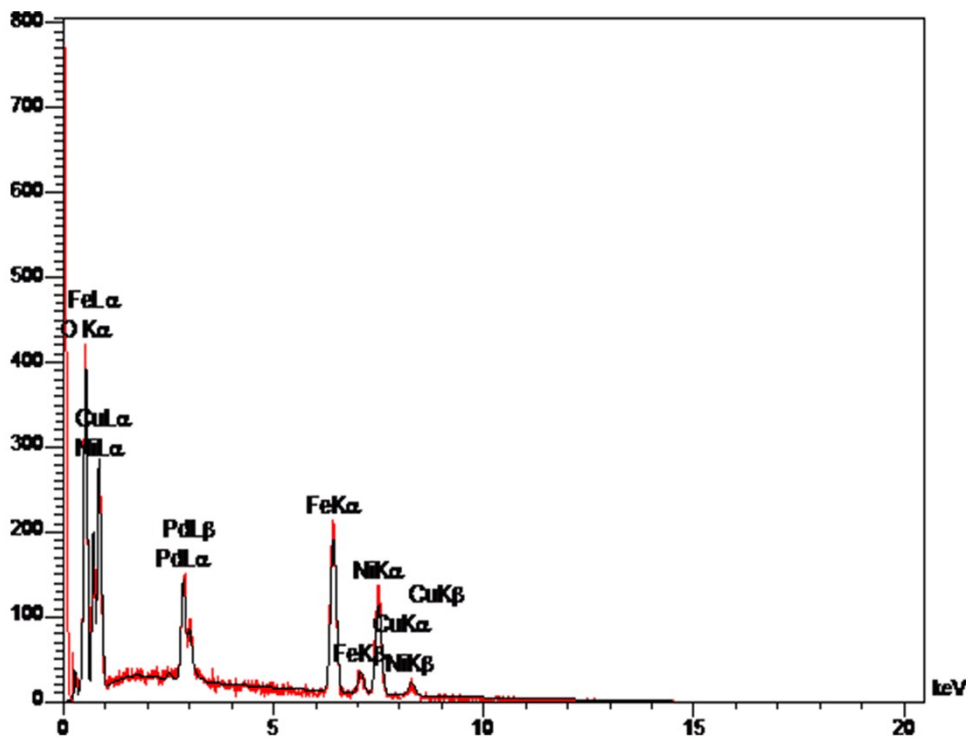

| Elt | Line | Int   | Error  | K      | Kr     | W%     | A%     | ZAF    | Formul | Ox%  | Pk  |
|-----|------|-------|--------|--------|--------|--------|--------|--------|--------|------|-----|
|     |      |       |        |        |        |        |        |        | a      |      |     |
| C   | Ka   | 6.9   | 3.9693 | 0.0302 | 0.0234 | 8.02   | 22.12  | 0.2917 |        | 0.00 | 5.2 |
| N   | Ka   | 3.5   | 3.9693 | 0.0207 | 0.0160 | 5.17   | 12.22  | 0.3098 |        | 0.00 | 5.2 |
| O   | Ka   | 27.8  | 3.9693 | 0.0603 | 0.0467 | 12.60  | 26.07  | 0.3706 |        | 0.00 | 29  |
| Fe  | Ka   | 103.2 | 0.7498 | 0.3887 | 0.3012 | 30.69  | 18.20  | 0.9813 |        | 0.00 | 17  |
| Ni  | Ka   | 62.1  | 0.7498 | 0.3653 | 0.2830 | 30.66  | 17.29  | 0.9231 |        | 0.00 | 13  |
| Cu  | Ka   | 0.7   | 0.7498 | 0.0054 | 0.0042 | 0.47   | 0.25   | 0.8822 |        | 0.00 | 2.2 |
| Pd  | La   | 50.7  | 0.6874 | 0.1295 | 0.1003 | 12.38  | 3.85   | 0.8104 |        | 0.00 | 6.4 |
| Ag  | La   | 0.0   | 0.0000 | 0.0000 | 0.0000 | 0.00   | 0.00   | 0.8260 |        | 0.00 | 4.5 |
|     |      |       |        | 1.0000 | 0.7748 | 100.00 | 100.00 |        |        | 0.00 |     |

Figure 1. EDX spectrum of fresh nano-composite ( $\text{Fe}_3\text{O}_4@\text{Pd}@\text{Ni}/\text{C}$ ).

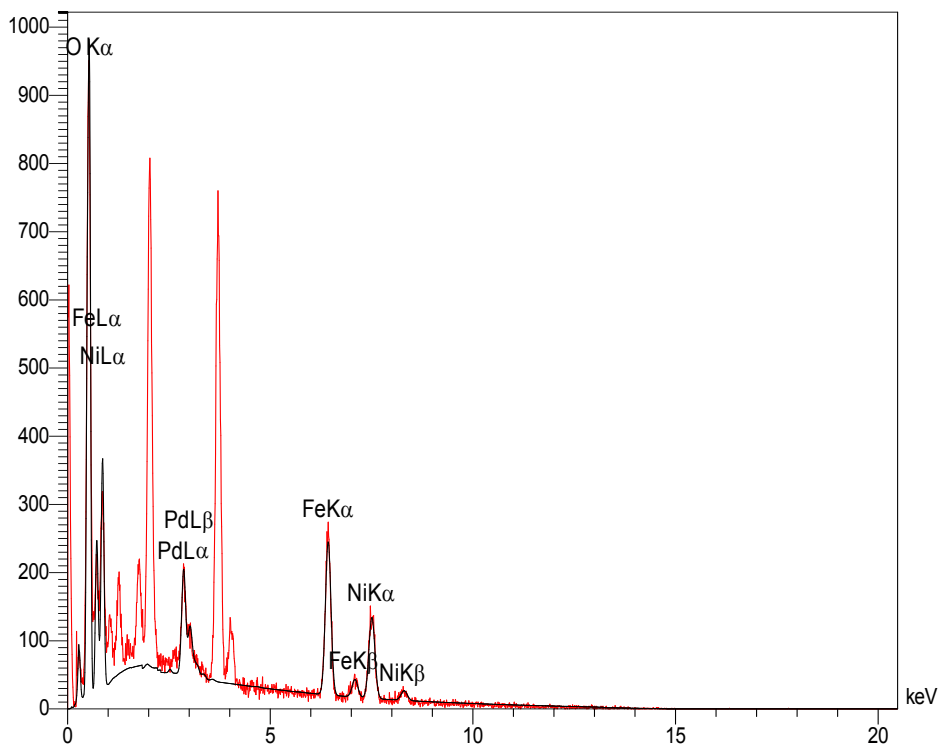

| Elt | Line | Int   | Error   | K      | Kr     | W%     | A%     | ZAF    | Formul | Ox%  | Pk  |
|-----|------|-------|---------|--------|--------|--------|--------|--------|--------|------|-----|
|     |      |       |         |        |        |        |        |        | a      |      |     |
| C   | Ka   | 15.3  | 20.1608 | 0.0476 | 0.0330 | 10.55  | 23.60  | 0.3127 |        | 0.00 | 4.0 |
| O   | Ka   | 121.6 | 20.1608 | 0.1887 | 0.1307 | 30.24  | 50.79  | 0.4322 |        | 0.00 | 26  |
| Fe  | Ka   | 127.0 | 0.6682  | 0.3425 | 0.2373 | 25.28  | 12.16  | 0.9385 |        | 0.00 | 12  |
| Ni  | Ka   | 72.4  | 0.6682  | 0.3049 | 0.2112 | 23.79  | 10.89  | 0.8880 |        | 0.00 | 9.7 |
| Pd  | La   | 63.7  | 51.8192 | 0.1164 | 0.0806 | 10.14  | 2.56   | 0.7951 |        | 0.00 | 5.1 |
|     |      |       |         | 1.0000 | 0.6928 | 100.00 | 100.00 |        |        | 0.00 |     |

Figure 2. EDX spectrum of nano-composite ( $\text{Fe}_3\text{O}_4@\text{Pd}@\text{Ni}/\text{C}$ ) after 8 times recovery.

### ***General procedure for the synthesis of distyrylbenzenes***

To a mixture of aryl halide (1 mmol), alkene (1.2 mmol), and  $\text{Na}_2\text{CO}_3$  (2.5 mmol) in DMF (3 mL), catalyst  $\text{Fe}_3\text{O}_4@\text{Pd}@\text{Ni}/\text{C}$  (0.075 g, with respect to Pd content 3.29 mol%) was added and heated on oil bath at 120 °C. The reaction was continuously followed by TLC to completion. After completion, the catalyst was removed by external magnet and was washed with dichloromethane ( $3 \times 5$  mL). Having extracted the reaction mixture from dichloromethane and water, the organic phase was dried

over Na<sub>2</sub>SO<sub>4</sub>. Evaporation of the solvent gave products. For further purification, the products passed through a short column of silica gel using *n*-hexane as eluent.

[It worth mentioning, in the case of 1,4-dihalobenzene or 9,10-dibromonanthracene (1 mmol), alkene (2.4 mmol), and Na<sub>2</sub>CO<sub>3</sub> (2.5 mmol) in DMF (3 mL), catalyst Fe<sub>3</sub>O<sub>4</sub>@Pd@Ni/C (0.15 g, with respect to Pd content 6.58 mol%) was added and heated on oil bath at 120 °C].

**Diethyl-3,3-(1,4-phenylene)-diacrylate** (Scheme 4, **6a**): <sup>1</sup>H-NMR (400 MHz, CDCl<sub>3</sub>) δ (ppm): 1.18 (t, *J* = 7.1 Hz, 6H), 4.11 (q, *J* = 7.1 Hz, 4H), 6.31 (d, *J* = 15.9 Hz, 2H), 7.38 (s, 4H), 7.51 (d, *J* = 15.9 Hz, 2H); <sup>13</sup>C-NMR (100 MHz, CDCl<sub>3</sub>) δ (ppm): 14.4, 60.7, 119.4, 128.5, 136.2, 143.5, 166.8.

**Dimethyl-3,3-(1,4-phenylene)-diacrylate** (Scheme 4, **6b**): <sup>1</sup>H-NMR (500 MHz, CDCl<sub>3</sub>) δ (ppm): 3.83 (s, 6H), 6.50 (d, *J* = 16.0 Hz, 2H), 7.56 (s, 4H), 7.70 (d, *J* = 16.0 Hz, 2H); <sup>13</sup>C-NMR (125 MHz, CDCl<sub>3</sub>) δ (ppm): 52.2, 119.4, 126.6, 129.0, 136.6, 144.1, 167.6.

**Diethyl-3,3-(1,4-phenylene)-diacrylate** (Scheme 4, **6c**): <sup>1</sup>H-NMR (400 MHz, CDCl<sub>3</sub>) δ (ppm): 1.27 (t, *J* = 7.1 Hz, 6H), 2.34 (s, 6H), 4.20 (q, *J* = 7.1 Hz, 4H), 6.31 (d, *J* = 15.9 Hz, 2H), 7.32 (s, 2H), 7.83 (d, *J* = 15.9 Hz, 2H); <sup>13</sup>C-NMR (100 MHz, CDCl<sub>3</sub>) δ (ppm): 14.4, 19.4, 60.2, 119.9, 128.7, 134.9, 135.6, 141.4, 167.0.

**1,4-Bis-(4-methylstyryl)-benzene** (Scheme 4, **7a**): <sup>1</sup>H-NMR (400 MHz, CDCl<sub>3</sub>) δ (ppm): 2.39 (s, 6H), 7.26-7.55 (m, 12H), 7.70 (d, *J* = 16.0 Hz, 2H); <sup>13</sup>C-NMR (100 MHz, CDCl<sub>3</sub>) δ (ppm): 28.9, 123.6, 124.3, 126.1, 126.7, 127.1, 128.3, 128.6, 128.8.

**1,4-Bis-(4-bromostyryl)-benzene** (Scheme 4, **7b**): <sup>1</sup>H-NMR (400 MHz, CDCl<sub>3</sub>) δ (ppm): 6.91-7.05 (m, 3H), 7.16-7.31 (m, 8H), 7.40-7.46 (m, 3H), 7.59-7.61 (m, 2H); <sup>13</sup>C-NMR (100 MHz, CDCl<sub>3</sub>) δ (ppm): 126.6, 127.5, 128.0, 128.2, 128.8, 129.6, 136.9, 137.8.

**2,5-Dimethoxy-1,4phenylene)-bis-(ethane-2,1-diyl)-dibenzene** (Scheme 4, **7c**): <sup>1</sup>H-NMR (400 MHz, CDCl<sub>3</sub>) δ (ppm): 3.86 (s, 6H), 7.03-7.07 (m, 4H), 7.16-7.20 (m, 4H), 7.27-7.31 (m, 4H), 7.40-7.49 (m, 4H); <sup>13</sup>C-NMR (100 MHz, CDCl<sub>3</sub>) δ (ppm): 56.4, 109.2, 123.3, 126.6, 127.5, 128.7, 129.0, 137.9, 138.2, 152.0.

**Diethyl-3,3-(anthracene-9,10-diyl)-diacrylate** (Scheme 5, **9**): <sup>1</sup>H-NMR (400 MHz, CDCl<sub>3</sub>) δ (ppm): 1.45 (t, *J* = 7.1 Hz, 6H), 4.42 (q, *J* = 7.1 Hz, 4H), 6.42 (d, *J* = 16.3 Hz, 2H), 7.52-7.60 (m, 4H), 8.27 (dt, *J*<sub>1</sub> = 6.2 Hz, *J*<sub>2</sub> = 3.1 Hz, 4H), 8.63 (d, *J* = 16.3 Hz, 2H); <sup>13</sup>C-NMR (100 MHz, CDCl<sub>3</sub>) δ (ppm): 14.4, 60.9, 125.9, 126.2, 127.9, 128.9, 131.0, 142.0, 166.3.

**9,10-Di-(E)-styrylanthracene (DSA)** (Scheme 5, **10a**): <sup>1</sup>H-NMR (400 MHz, CDCl<sub>3</sub>) δ (ppm): 6.98 (d, *J* = 16.5 Hz, 2H), 7.36-7.43 (m, 2H), 7.47-7.53 (m, 8H), 7.71-7.75 (m, 4H), 7.79 (d, *J* = 16.5 Hz, 2H), 8.40-8.46 (m, 4H); <sup>13</sup>C-NMR (100 MHz, CDCl<sub>3</sub>) δ (ppm): 125.2, 125.3, 126.5, 126.6, 128.1, 128.9, 129.6, 132.7, 137.3, 137.5.

**9,10-Bis(E)-4-methylstyrylanthracene (BMSA)** (Scheme 5, **10b**): <sup>1</sup>H-NMR (400 MHz, CDCl<sub>3</sub>) δ (ppm): 2.46 (s, 6H), 6.94 (d, *J* = 16.5 Hz, 2H), 7.31 (d, *J* = 7.8 Hz, 4H), 7.47-7.52 (m, 4H), 7.62 (d, *J* = 7.9 Hz, 4H), 7.91 (d, *J* = 16.5 Hz, 2H), 8.40-8.45

(m, 4H); <sup>13</sup>C-NMR (100 MHz, CDCl<sub>3</sub>) δ (ppm): 21.6, 124.2, 125.2, 126.5, 129.5, 129.6, 132.8, 134.6, 137.3, 138.0.

**9,10-Bis(E)-4-chlorostyrylanthracene (BCSA)** (Scheme 5, **10c**): <sup>1</sup>H-NMR (400 MHz, CDCl<sub>3</sub>) δ (ppm): 6.82 (d, *J* = 16.0 Hz, 2H), 7.35-7.37 (m, 4H), 7.41-7.44 (m, 4H), 7.54-7.56 (m, 4H), 7.84 (d, *J* = 16.0 Hz, 2H), 8.28-8.31 (m, 4H); <sup>13</sup>C-NMR (100 MHz, CDCl<sub>3</sub>) δ (ppm): 125.4, 125.8, 126.4, 127.8, 128.2, 129.0, 129.5, 132.3, 135.7, 136.3.

### **General procedure for the synthesis of biphenyls**

To a round bottom flask (10 mL), aryl halide (1 mmol), phenylboronic acid derivatives (1.2 mmol), and sodium carbonate (2.5 mmol) in water (3 mL), catalyst Fe<sub>3</sub>O<sub>4</sub>@Pd@Ni/C (0.05 g, with respect to Pd content 2.19 mol%) was added and heated on oil bath at 80 °C. The reaction was continuously followed by TLC to completion. After completion, the catalyst was removed by external magnet and was washed with dichloromethane (3 × 5 mL). Having extracted the reaction mixture from dichloromethane and water, the organic phase was dried over Na<sub>2</sub>SO<sub>4</sub>. Evaporation of the solvent gave products. For further purification, the products passed through a short column of silica gel using *n*-hexane as eluent.

[It worth mentioning, in the case of 1,4-dihalobenzene (1 mmol), phenylboronic acid derivatives (2.4 mmol), and Na<sub>2</sub>CO<sub>3</sub> (2.5 mmol) in water (3 mL), catalyst Fe<sub>3</sub>O<sub>4</sub>@Pd@Ni/C (0.1 g, with respect to Pd content 4.38 mol%) was added and heated on oil bath at 80 °C].

**3,3''-Dimethyl-1,1';4',1''-terphenyl** (Scheme 7, **14b**): <sup>1</sup>H-NMR (400 MHz, CDCl<sub>3</sub>) δ (ppm): 2.48 (s, 6H), 7.22 (d, *J* = 7.5 Hz, 2H), 7.39 (t, *J* = 7.5 Hz, 2H), 7.46-7.53 (m, 4H), 7.70 (s, 4H); <sup>13</sup>C-NMR (100 MHz, CDCl<sub>3</sub>) δ (ppm): 21.6, 124.2, 127.5, 127.9, 128.1, 129.0, 138.4, 140.2, 140.8.

**2,2''-Dimethyl-1,1';4',1''-terphenyl** (Scheme 7, **14c**): <sup>1</sup>H-NMR (400 MHz, CDCl<sub>3</sub>) δ (ppm): 2.31 (s, 6H), 7.20-7.28 (m, 8H), 7.33 (s, 4H); <sup>13</sup>C-NMR (100 MHz, CDCl<sub>3</sub>) δ (ppm): 20.5, 125.7, 127.2, 128.8, 129.8, 130.3, 135.4, 140.3, 141.6.

**4,4''-Difluoro-1,1';4',1''-terphenyl** (Scheme 7, **14d**): <sup>1</sup>H-NMR (400 MHz, CDCl<sub>3</sub>) δ (ppm): 7.14-7.23 (m, 4H), 7.59-7.63 (m, 4H), 7.64 (s, 4H); <sup>13</sup>C-NMR (100 MHz, CDCl<sub>3</sub>) δ (ppm): 115.7 (*J*<sub>C-F</sub> = 22 Hz), 127.4, 128.6 (*J*<sub>C-F</sub> = 8 Hz), 136.7 (*J*<sub>C-F</sub> = 3 Hz), 139.2, 162.6 (*J*<sub>C-F</sub> = 245 Hz).

**2,4-Di(naphthalene-1-yl)benzene** (Scheme 7, **14e**): <sup>1</sup>H-NMR (400 MHz, CDCl<sub>3</sub>) δ (ppm): 7.39-7.52 (m, 8H), 7.55 (s, 4H), 7.80-7.89 (m, 4H), 7.98-8.02 (m, 2H); <sup>13</sup>C-NMR (100 MHz, CDCl<sub>3</sub>) δ (ppm): 125.5, 125.9, 126.1, 126.2, 127.1, 127.8, 128.4, 130.0, 131.7, 133.9, 139.7, 140.0.

**4-Iodo-4'-methoxy-1,1'-biphenyl** (Scheme 7, **15**): <sup>1</sup>H-NMR (400 MHz, CDCl<sub>3</sub>) δ (ppm): 3.78 (s, 6H), 6.87-6.94 (m, 2H), 7.19-7.24 (m, 2H), 7.38-7.44 (m, 2H), 7.62-7.71 (m, 2H); <sup>13</sup>C-NMR (100 MHz, CDCl<sub>3</sub>) δ (ppm): 55.4, 92.2, 114.4, 127.9, 128.6, 132.5, 137.8, 140.3, 159.5.

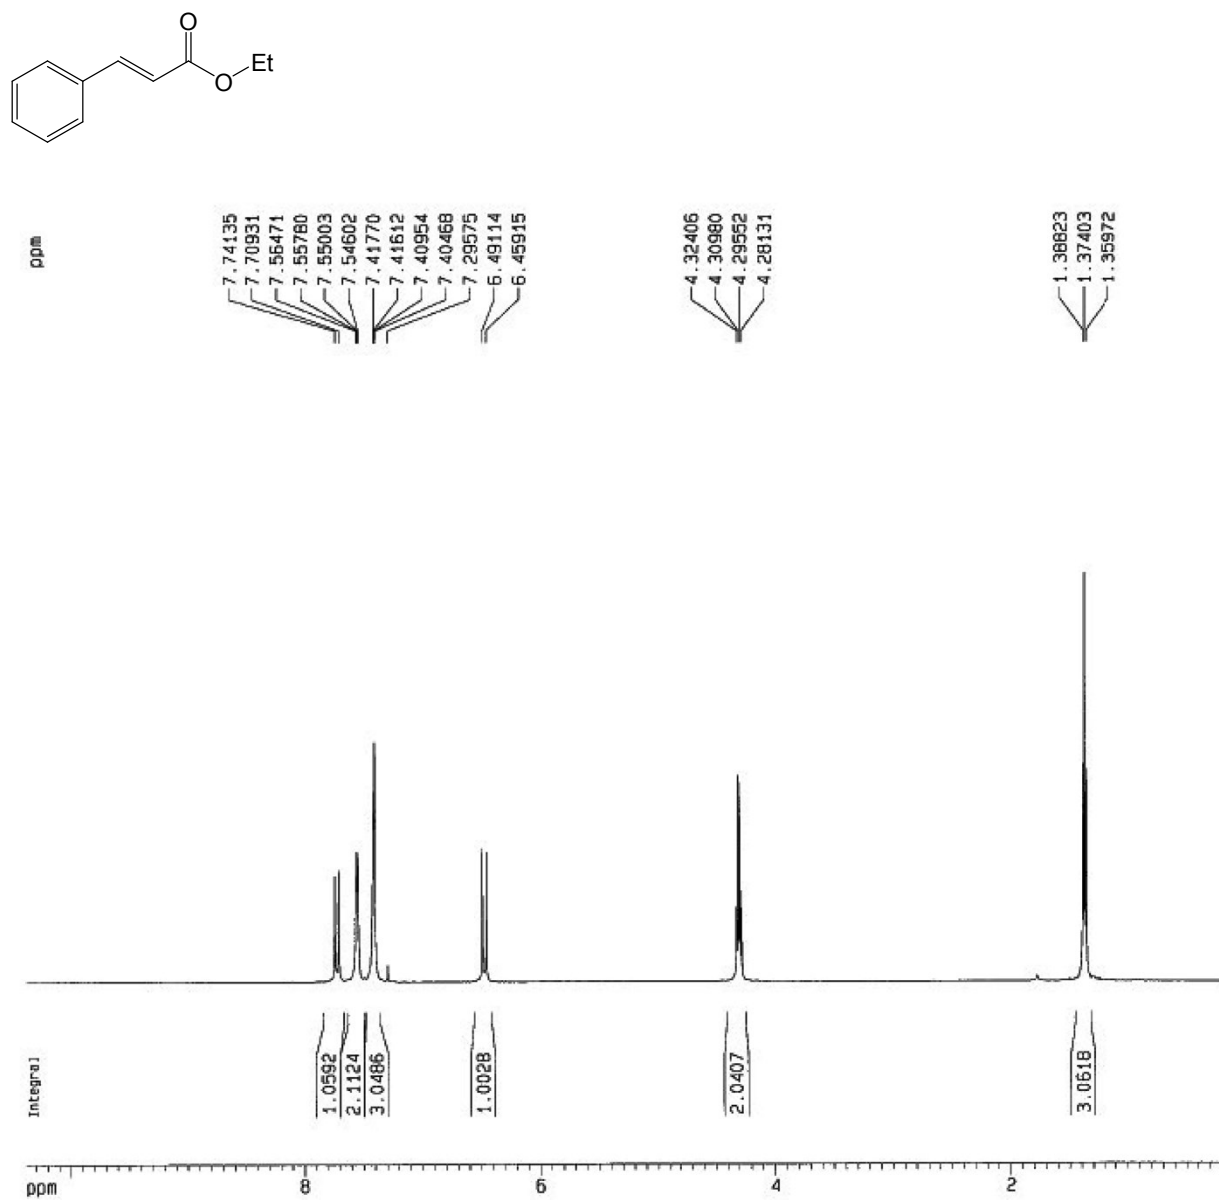

Figure 3.  $^1\text{H-NMR}$  for compound **3a**

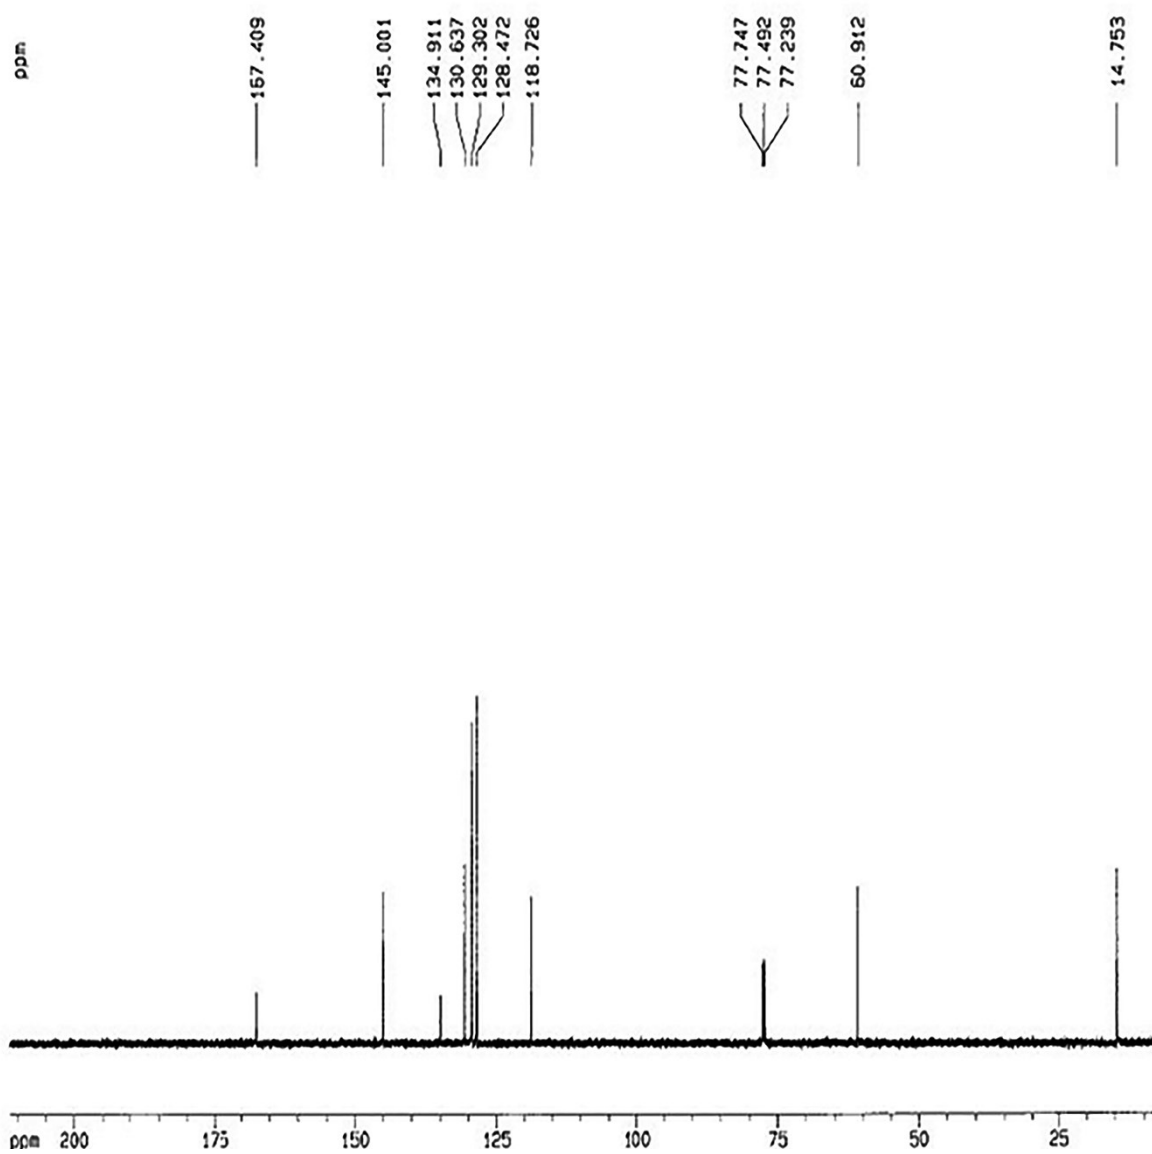

Figure 4.  $^{13}\text{C}$ -NMR for compound 3a

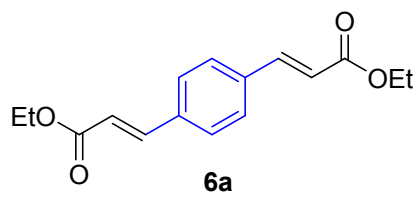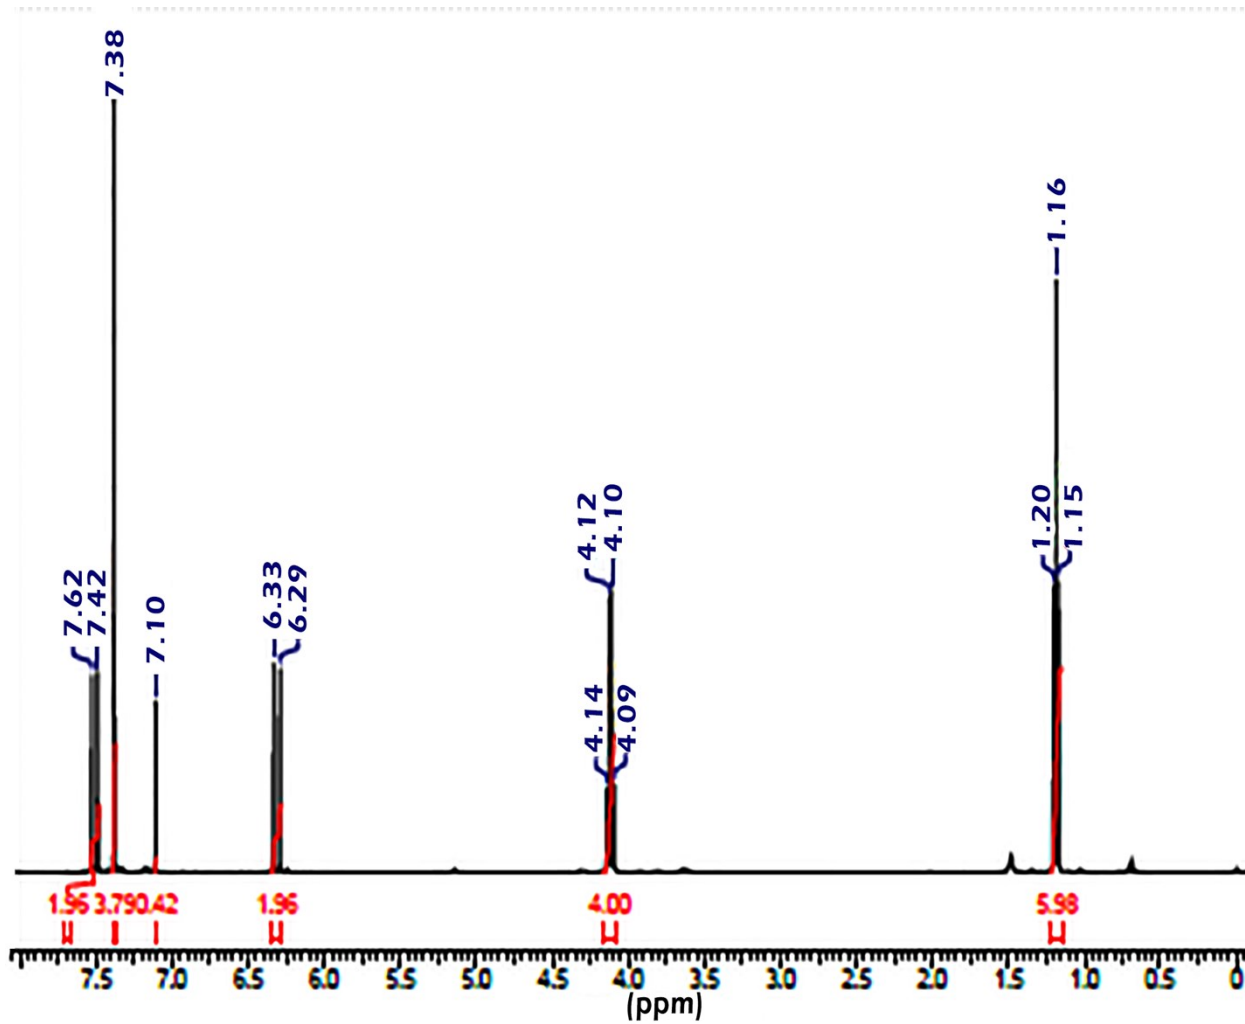

Figure 5. <sup>1</sup>H-NMR for compound **6a**



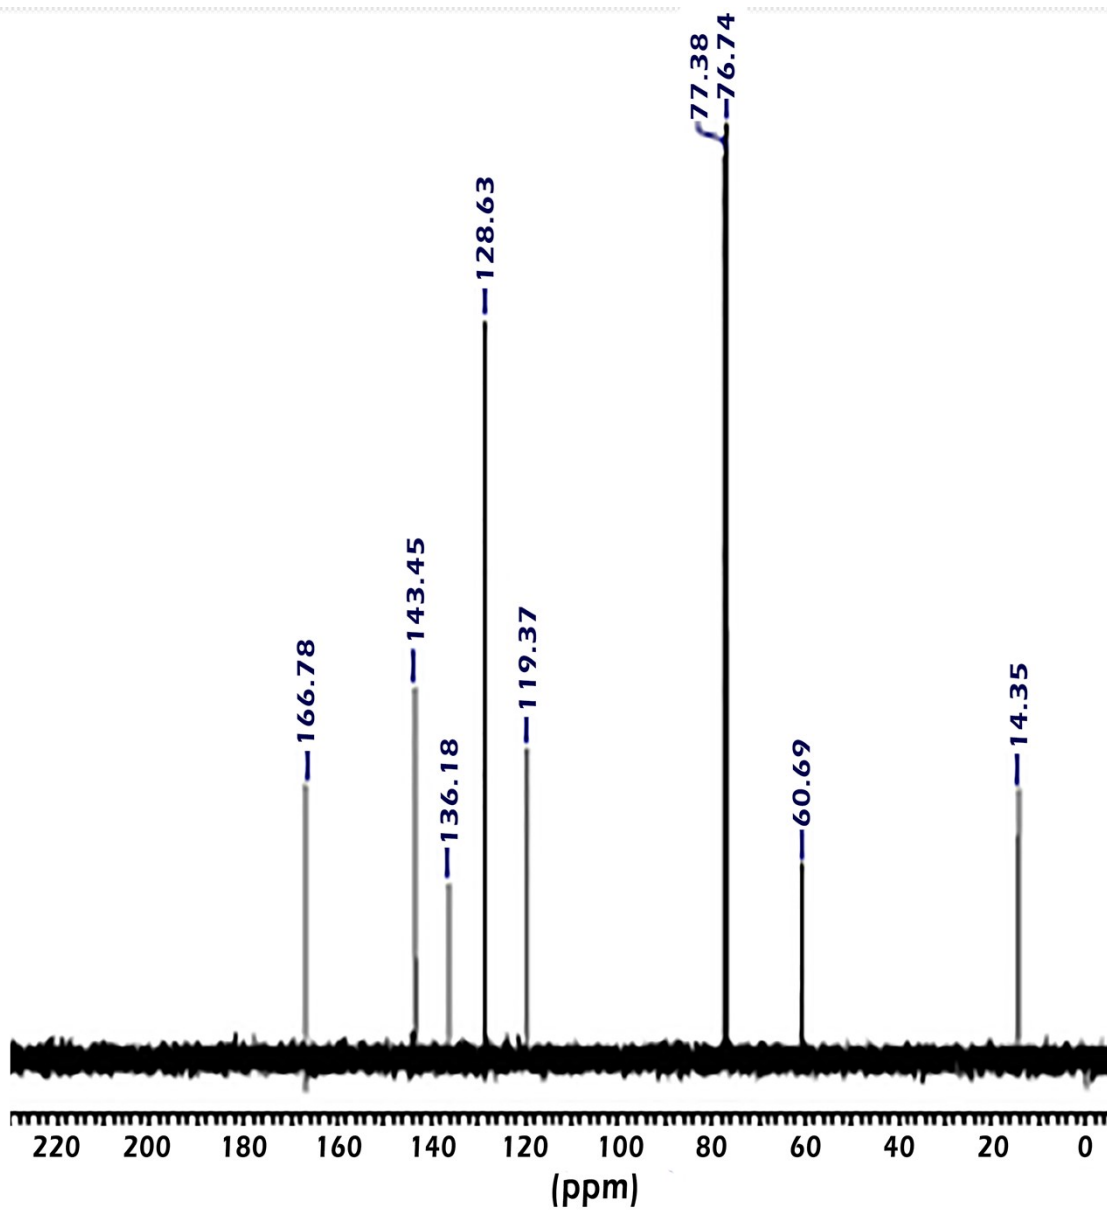

Figure 6.  $^{13}\text{C}$ -NMR for compound 6a

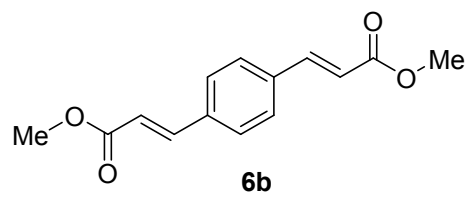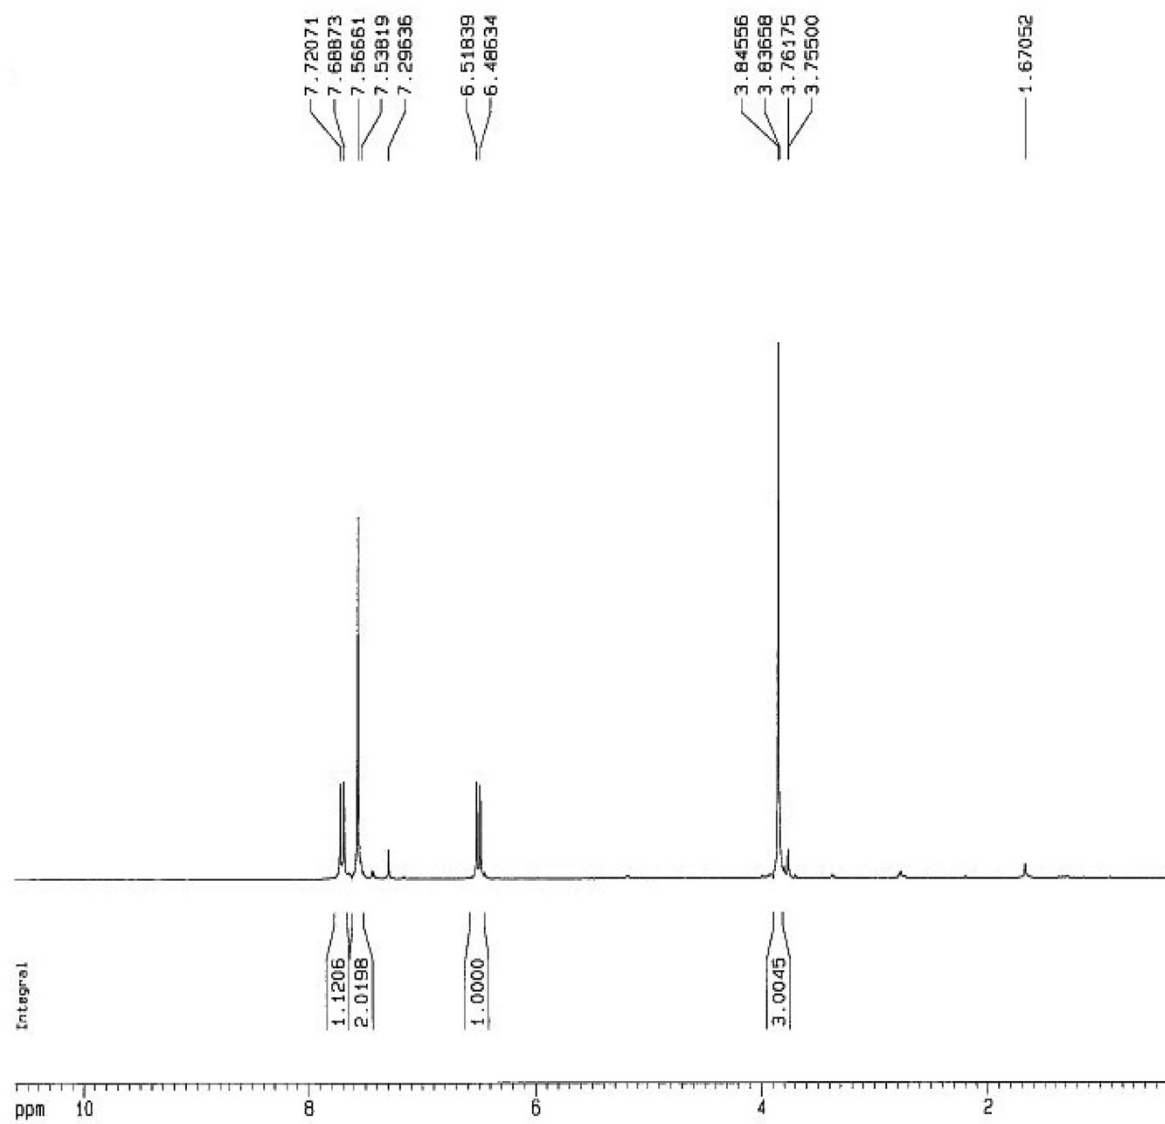

Figure 7.  $^1\text{H-NMR}$  for compound **6b**

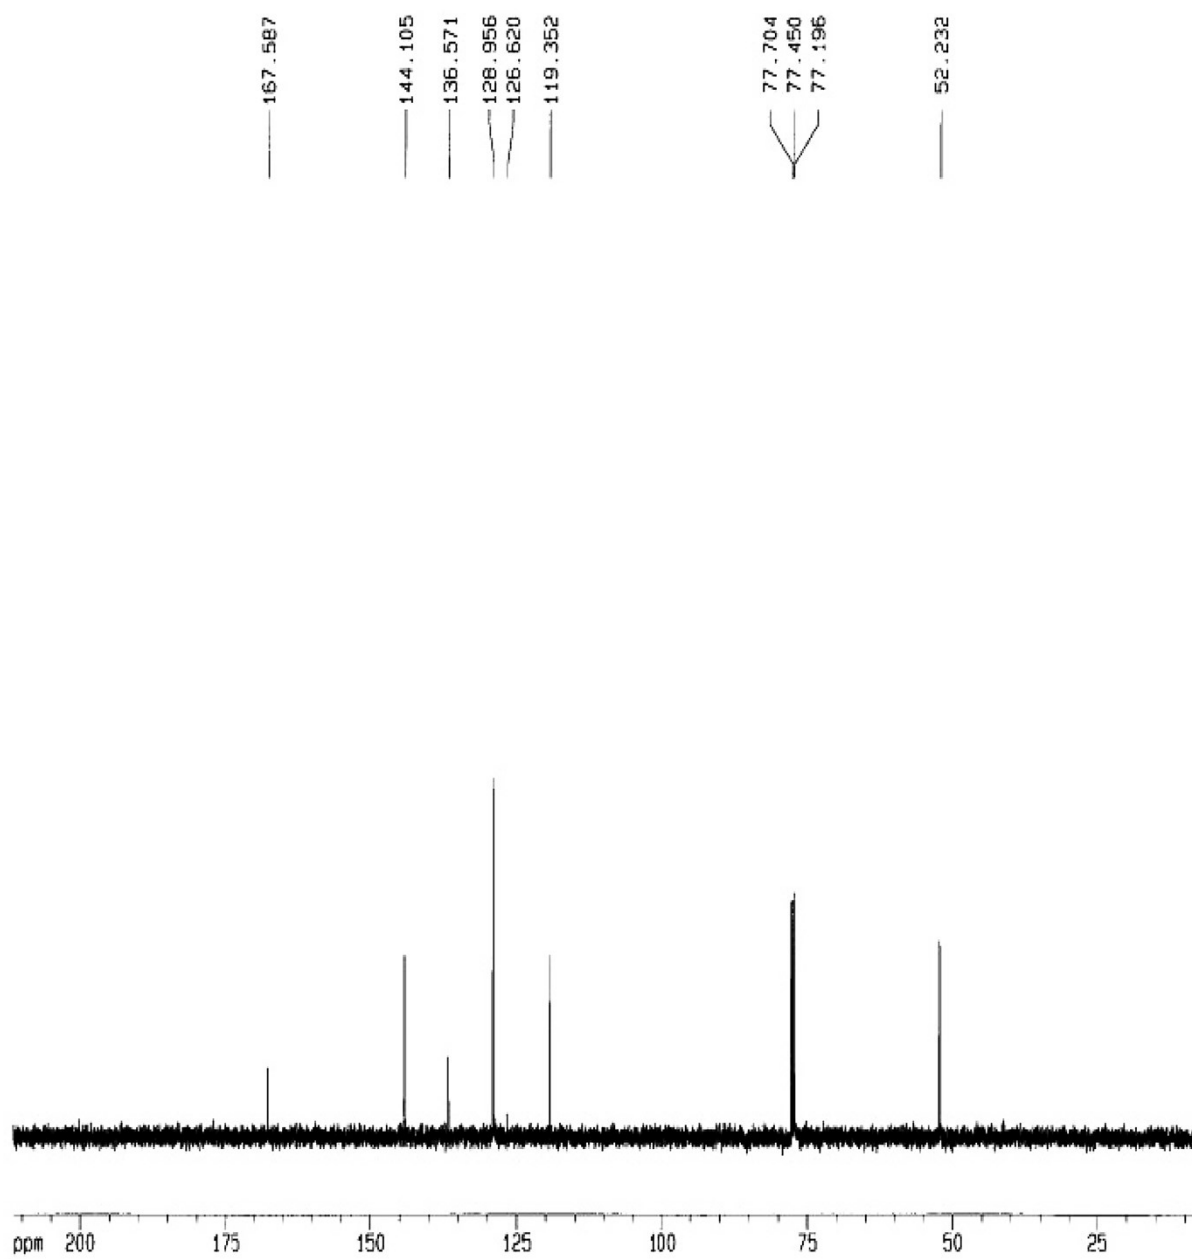

Figure 8.  $^{13}\text{C}$ -NMR for compound **6b**

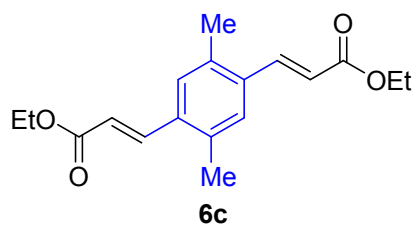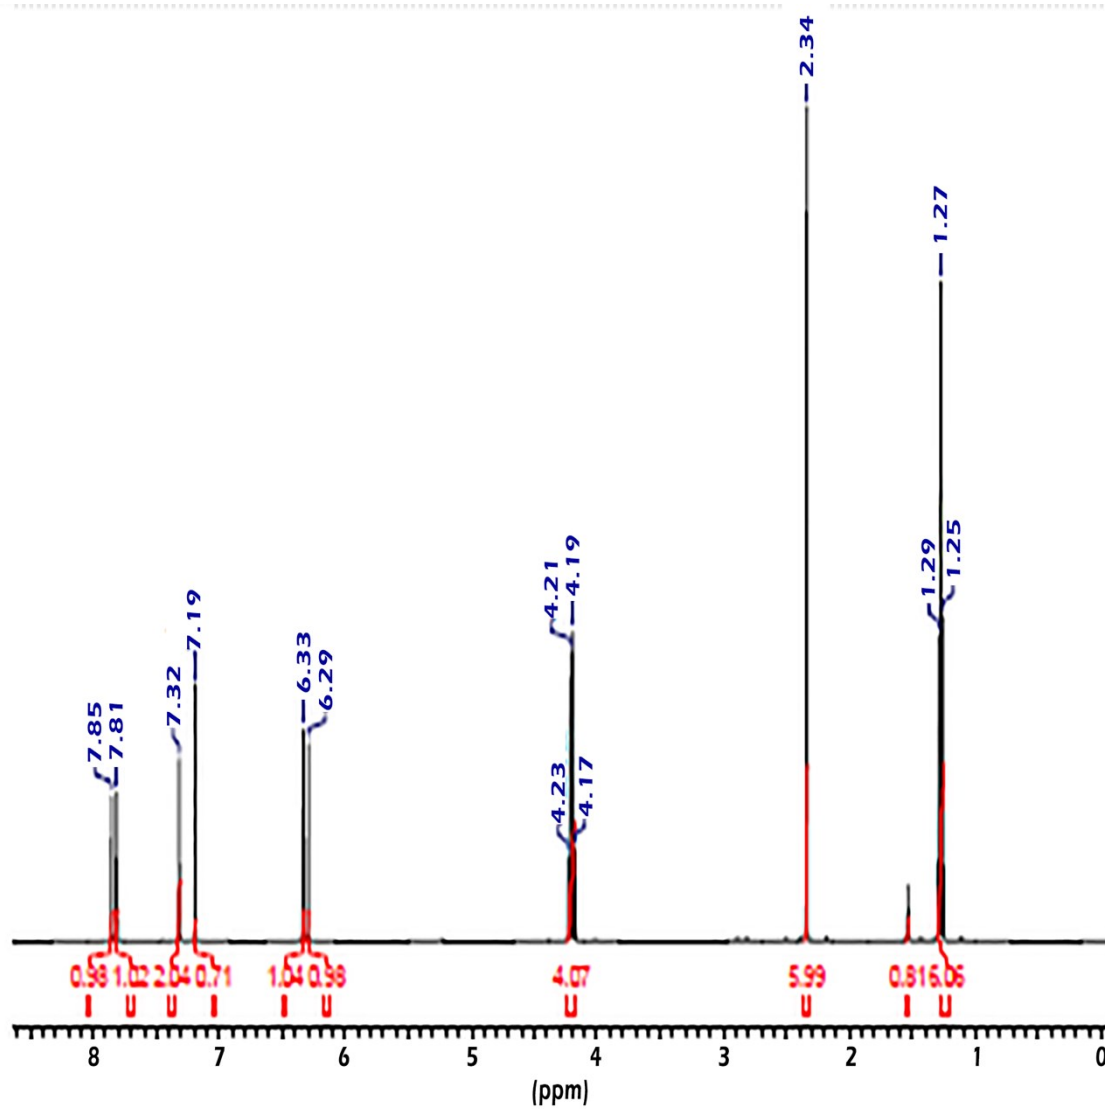

Figure 9.  $^1\text{H}$ -NMR for compound **6c**.

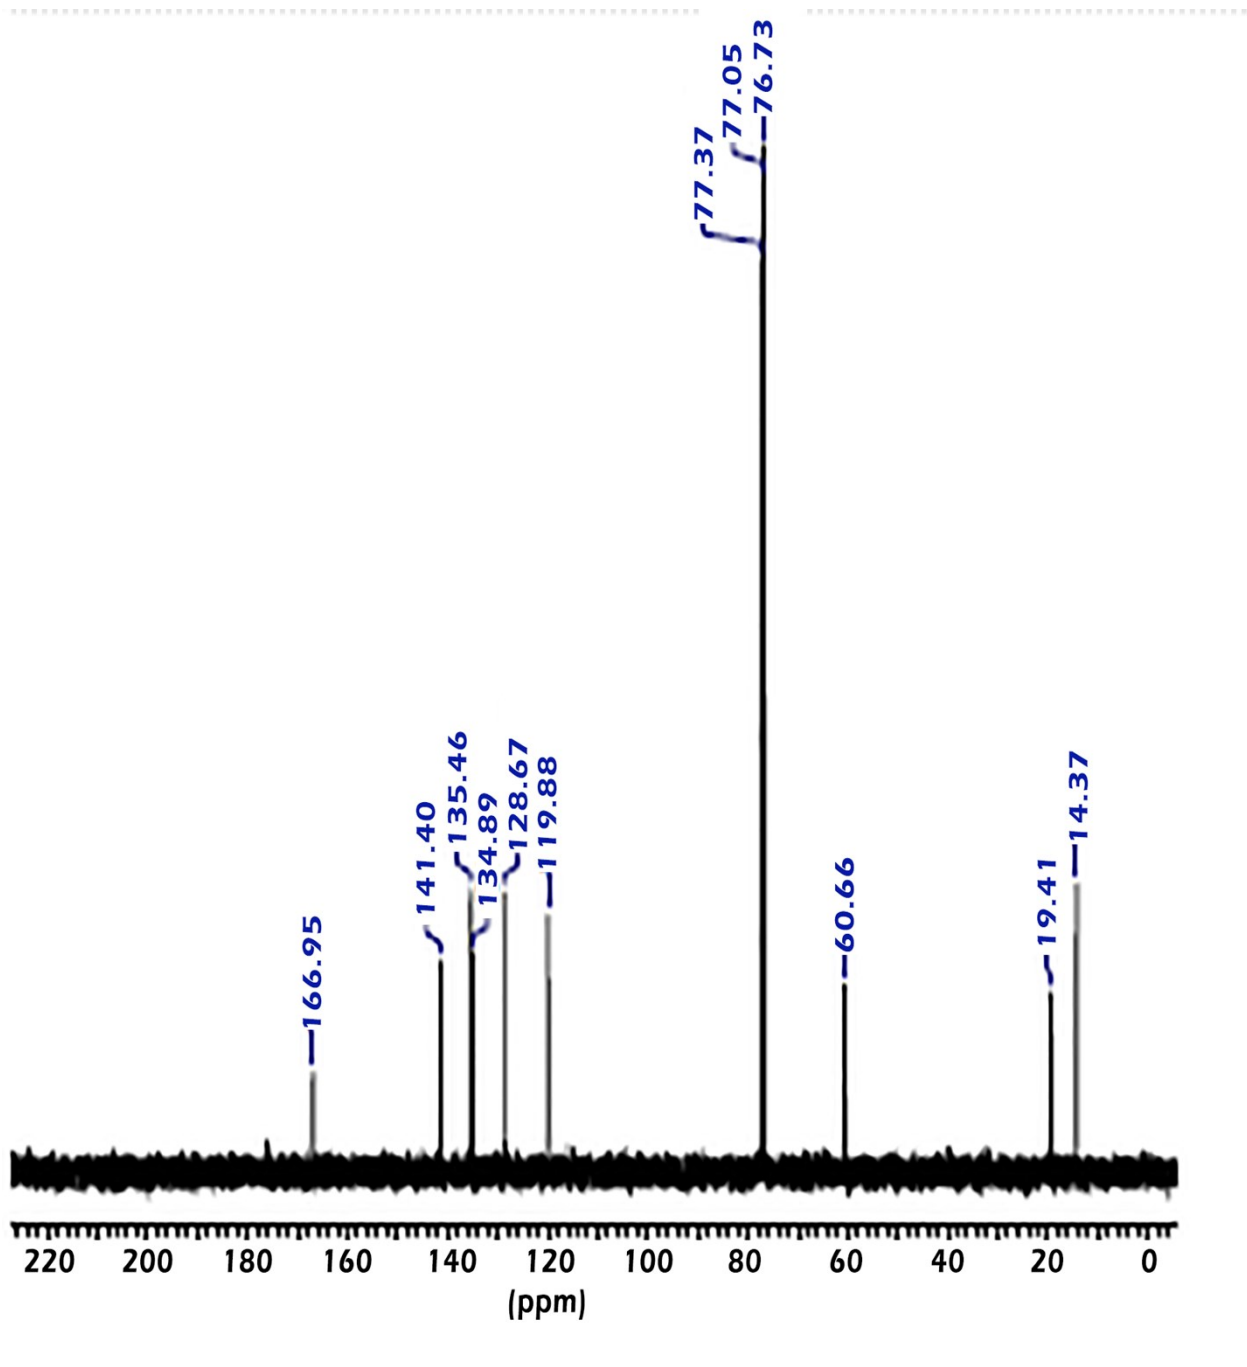

Figure 10.  $^{13}\text{C}$ -NMR for compound **6c**.

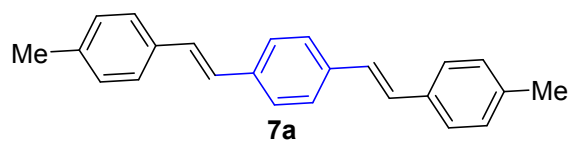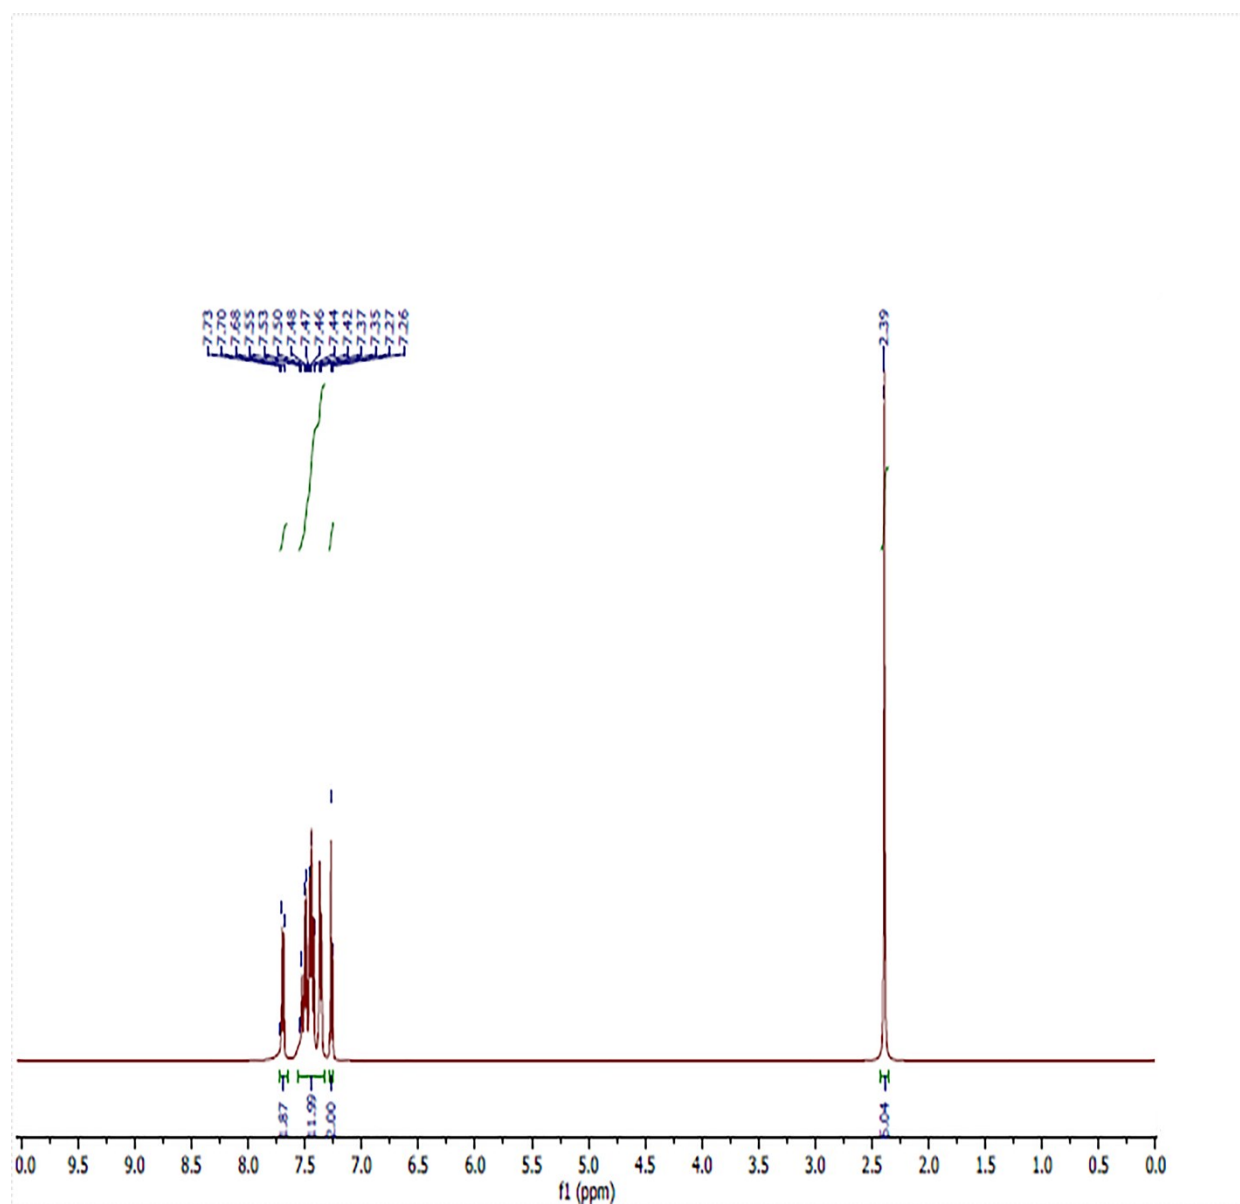

Figure 11.  $^1\text{H-NMR}$  for compound **7a**.

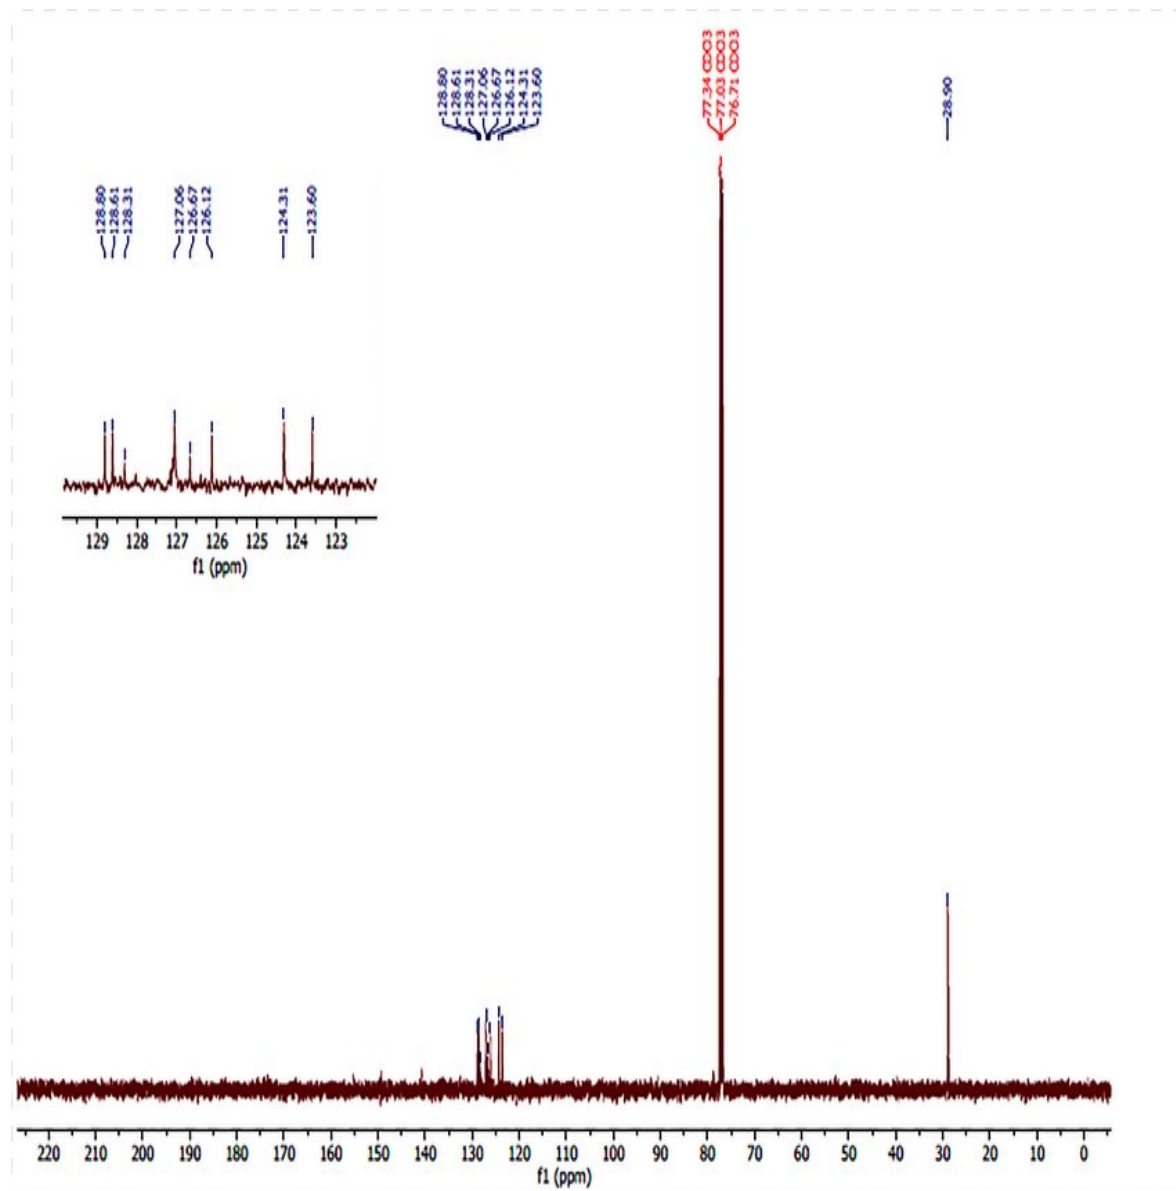

Figure 12.  $^{13}\text{C}$ -NMR for compound **7a**.

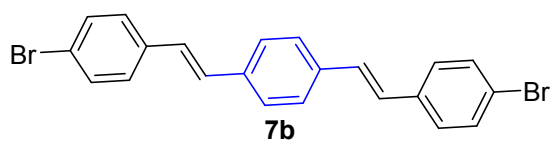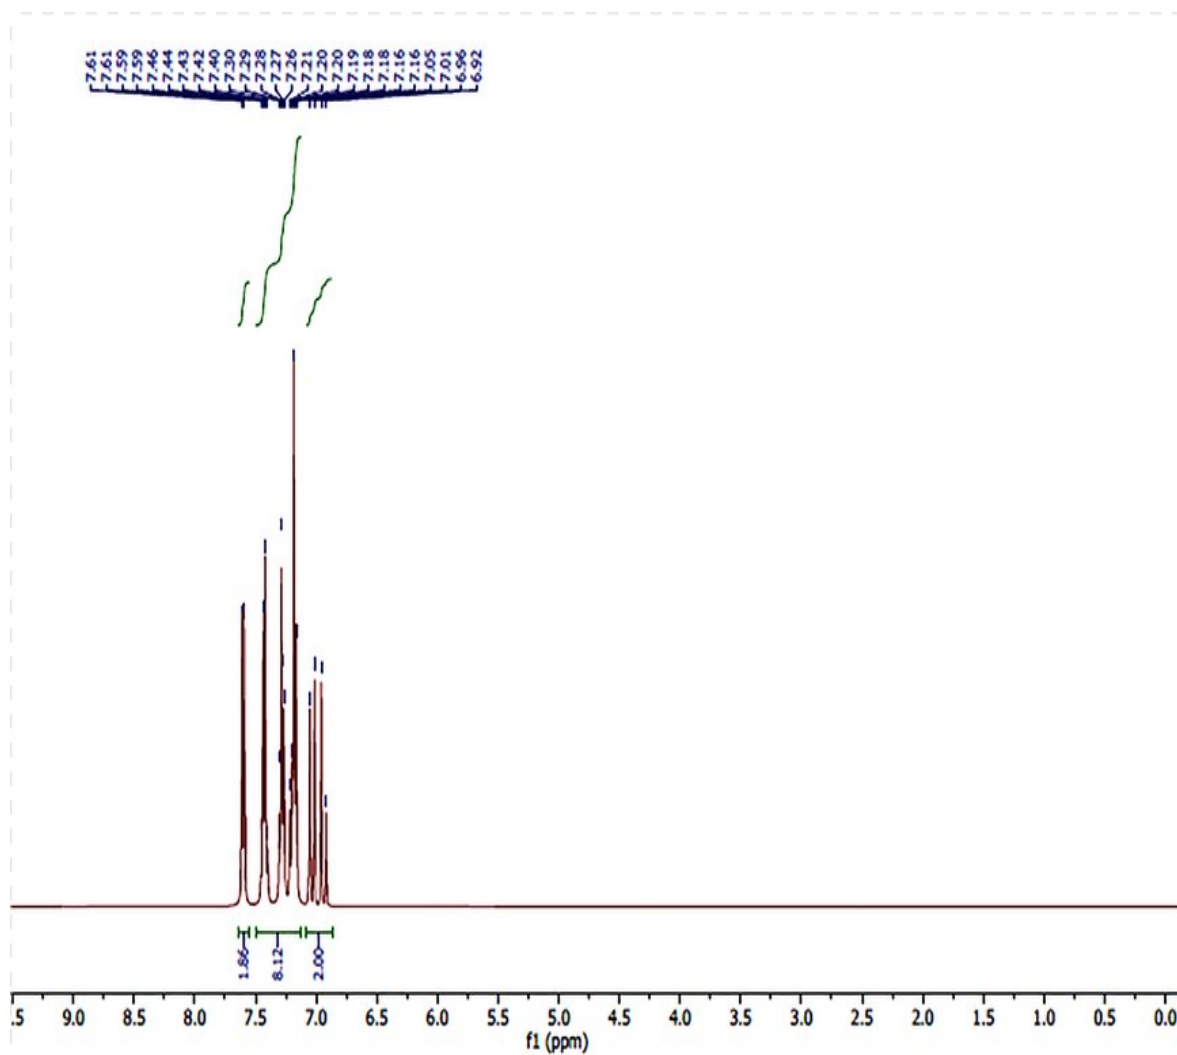

Figure 13. <sup>1</sup>H-NMR for compound **7b**.



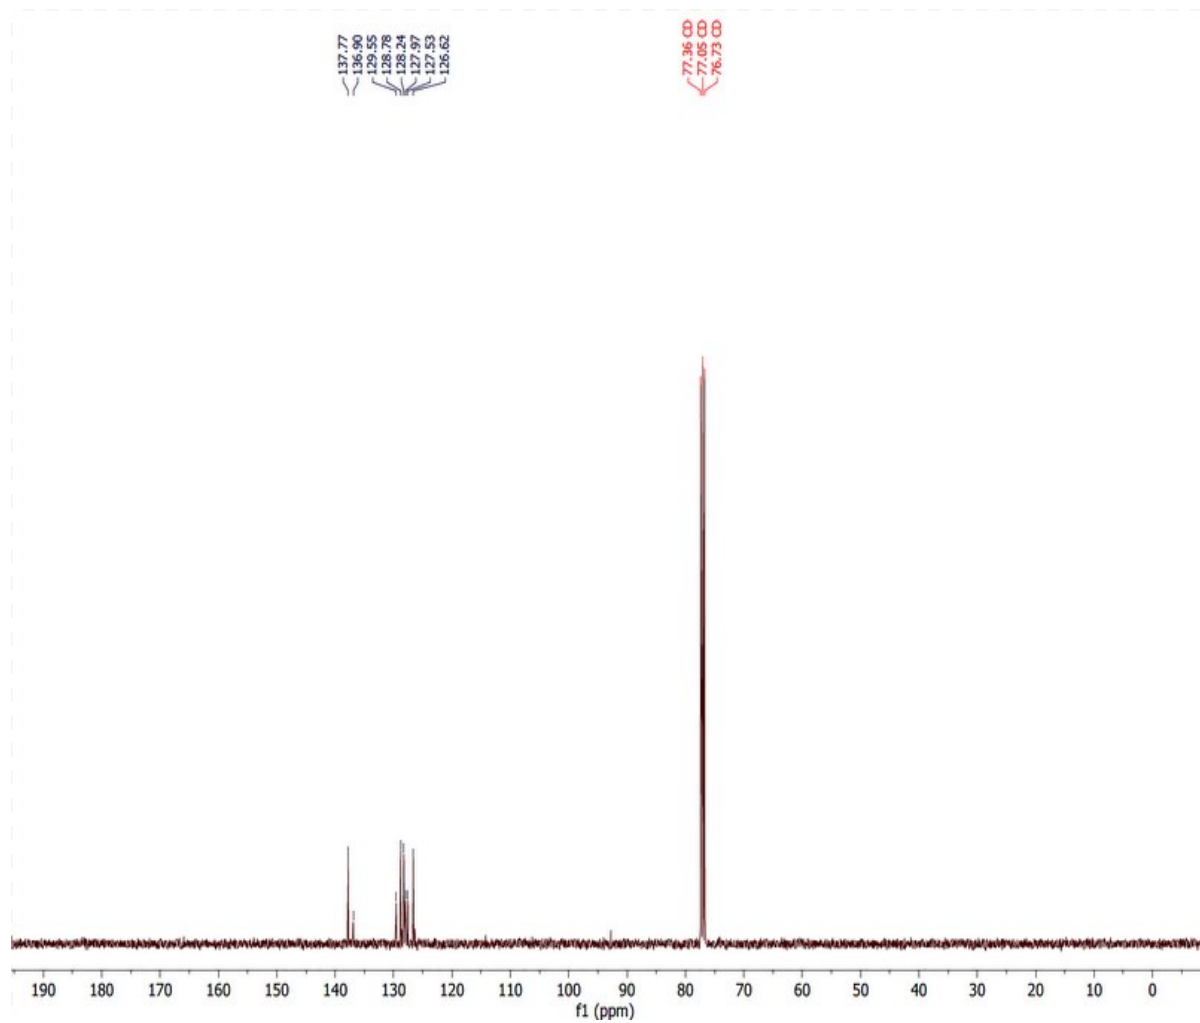

Figure 14.  $^{13}\text{C}$ -NMR for compound **7b**.

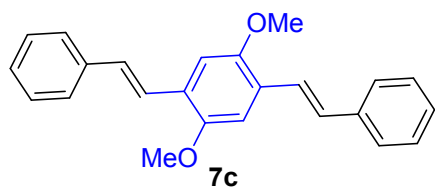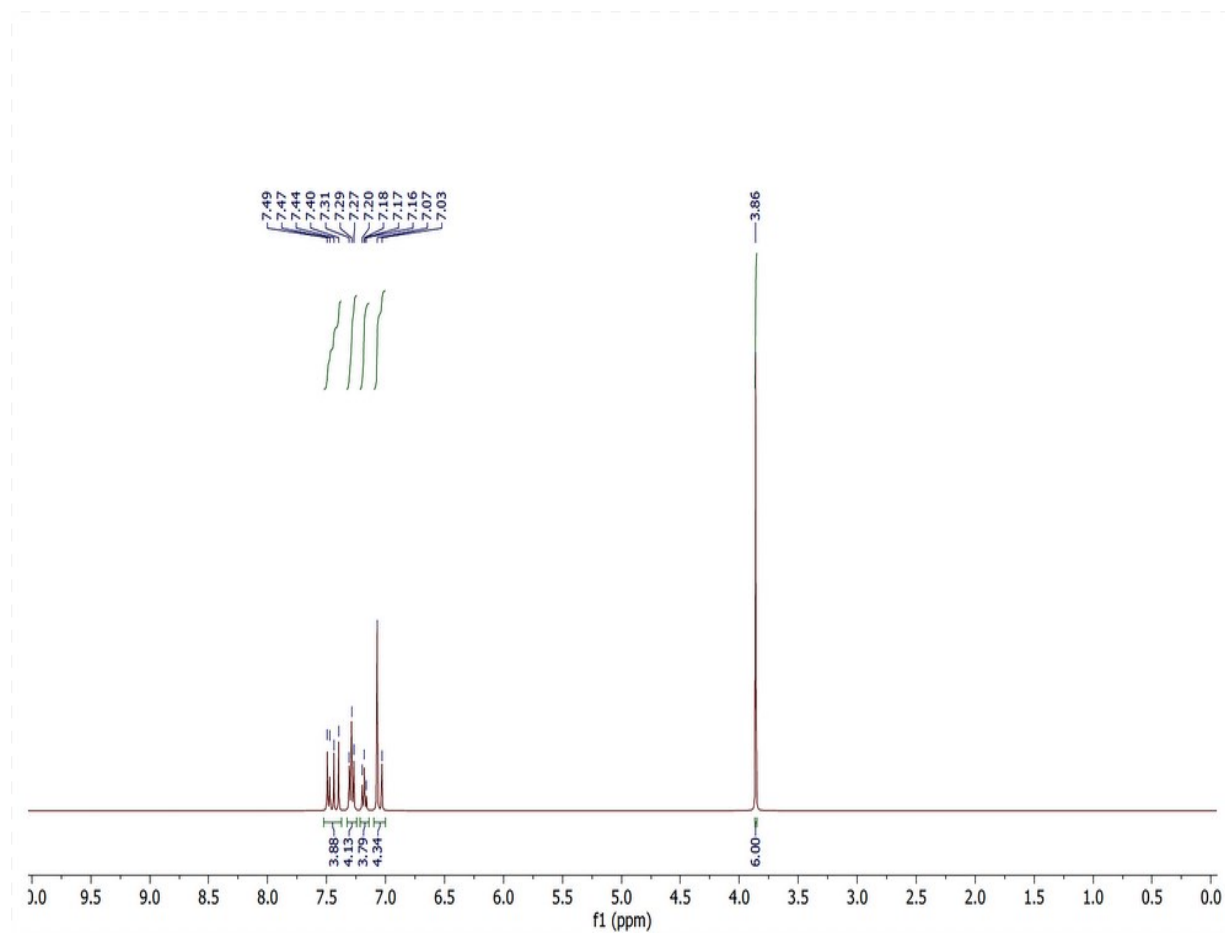

Figure 15. <sup>1</sup>H-NMR for compound **7c**.

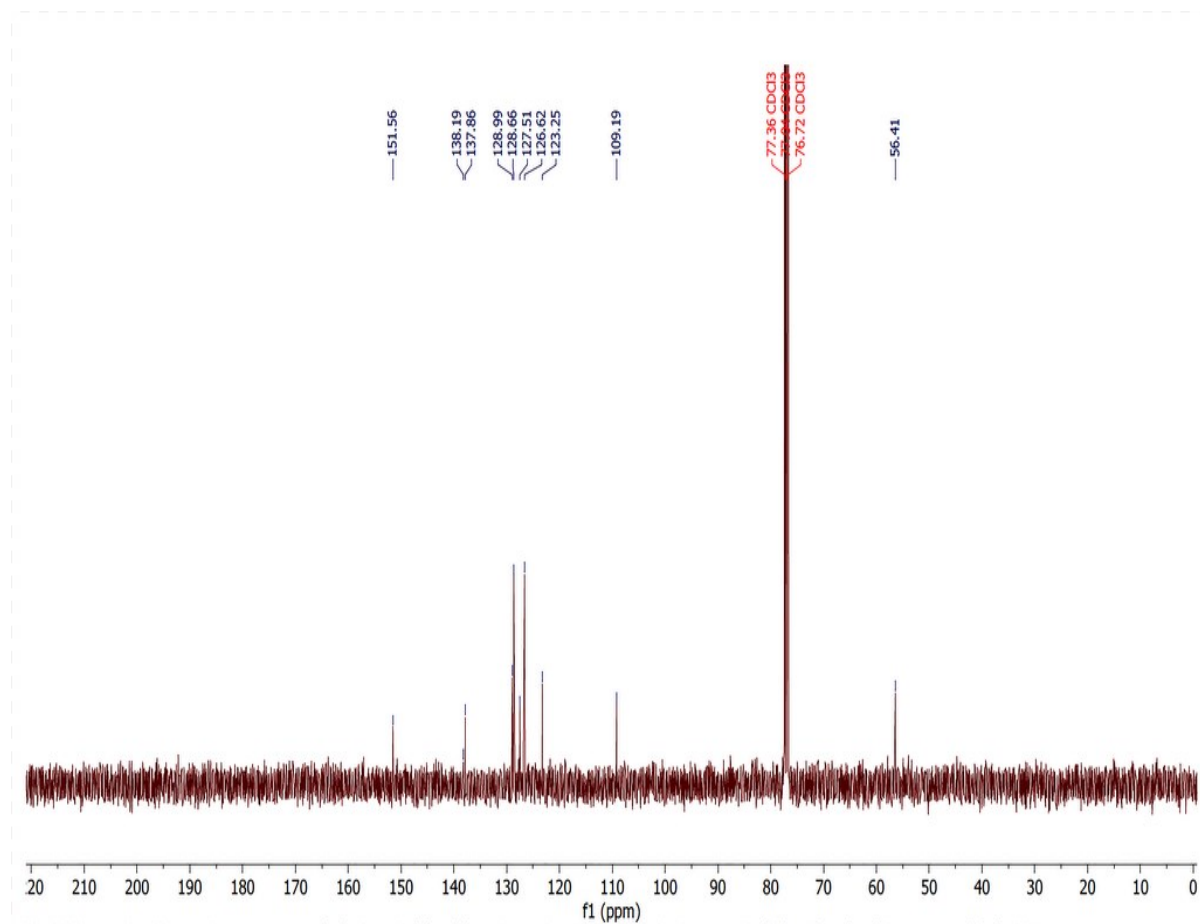

Figure 16.  $^{13}\text{C}$ -NMR for compound **7c**.

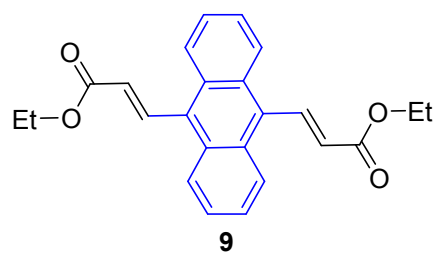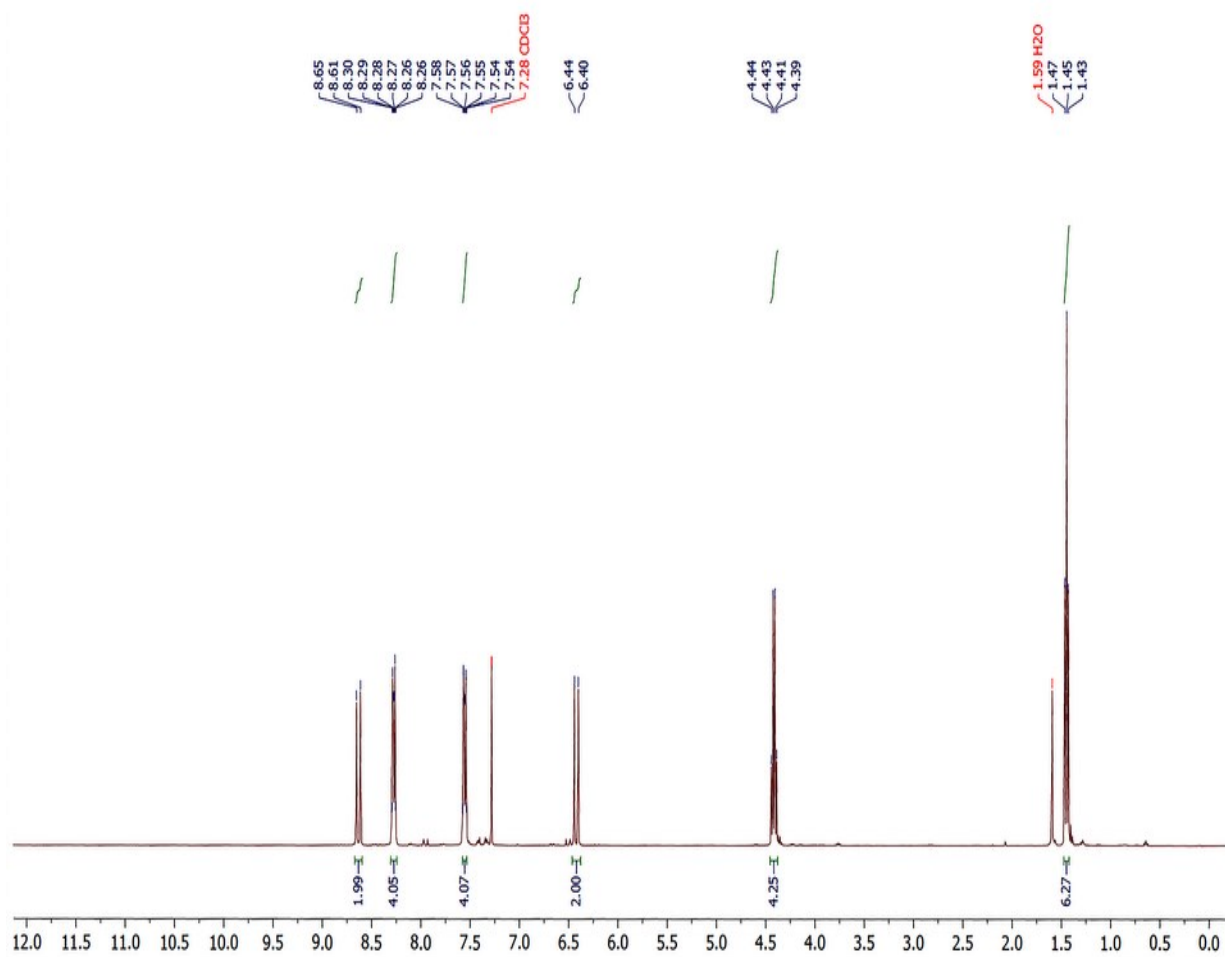

Figure 17. <sup>1</sup>H-NMR for compound **9**

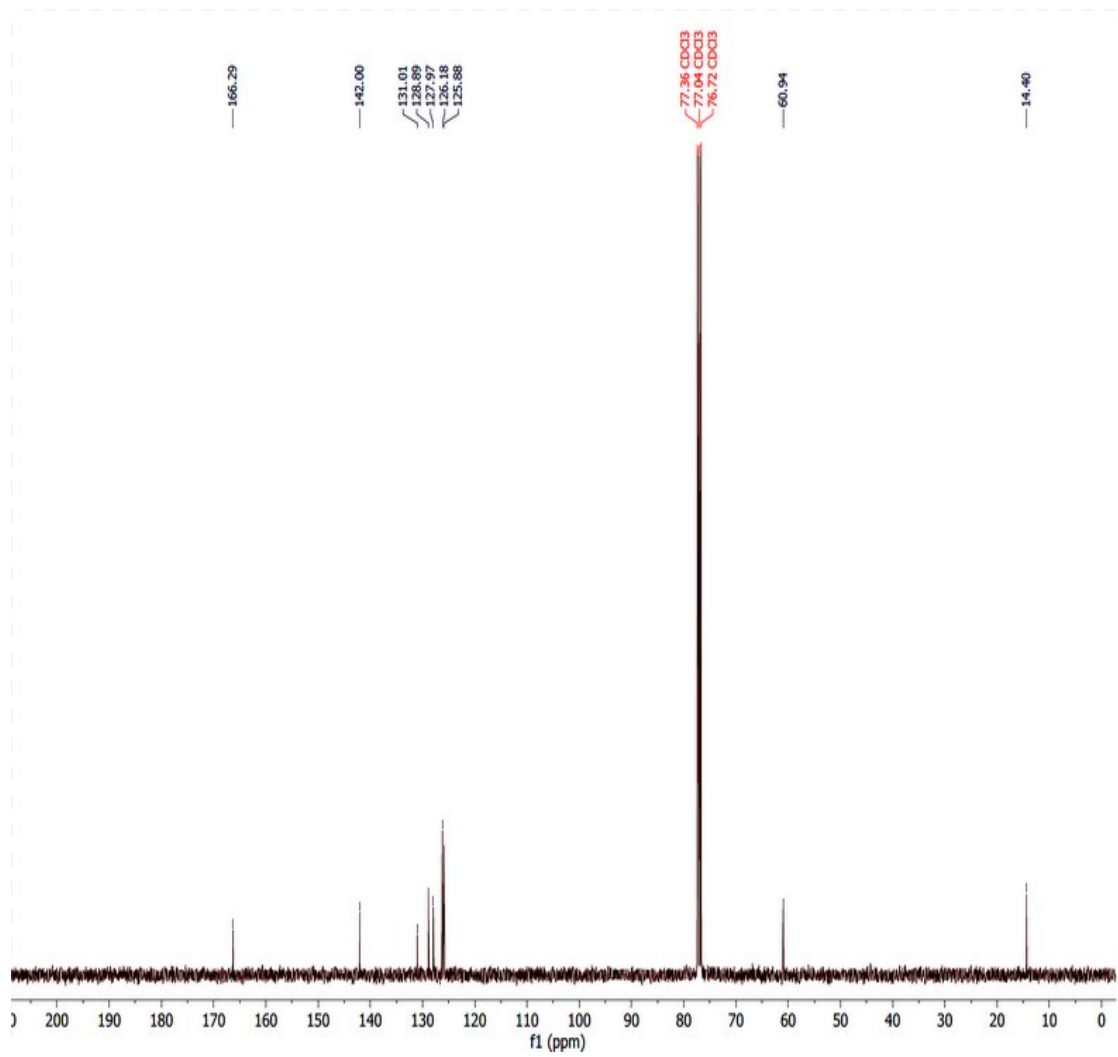

Figure 18.  $^{13}\text{C}$ -NMR for compound **9**

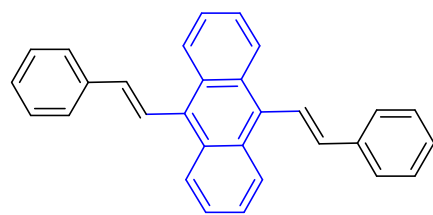

**10a**

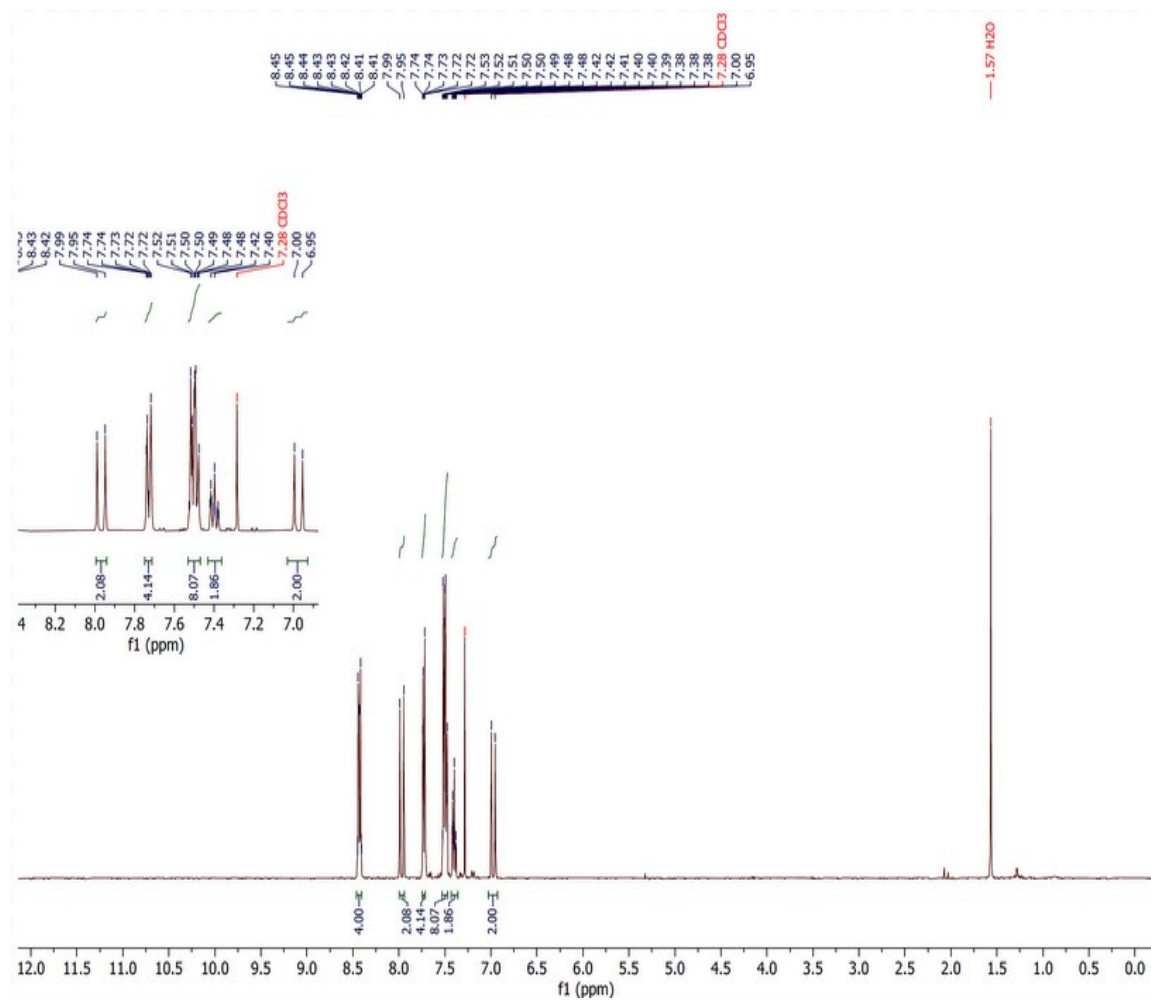

Figure 19. <sup>1</sup>H-NMR for compound **10a**

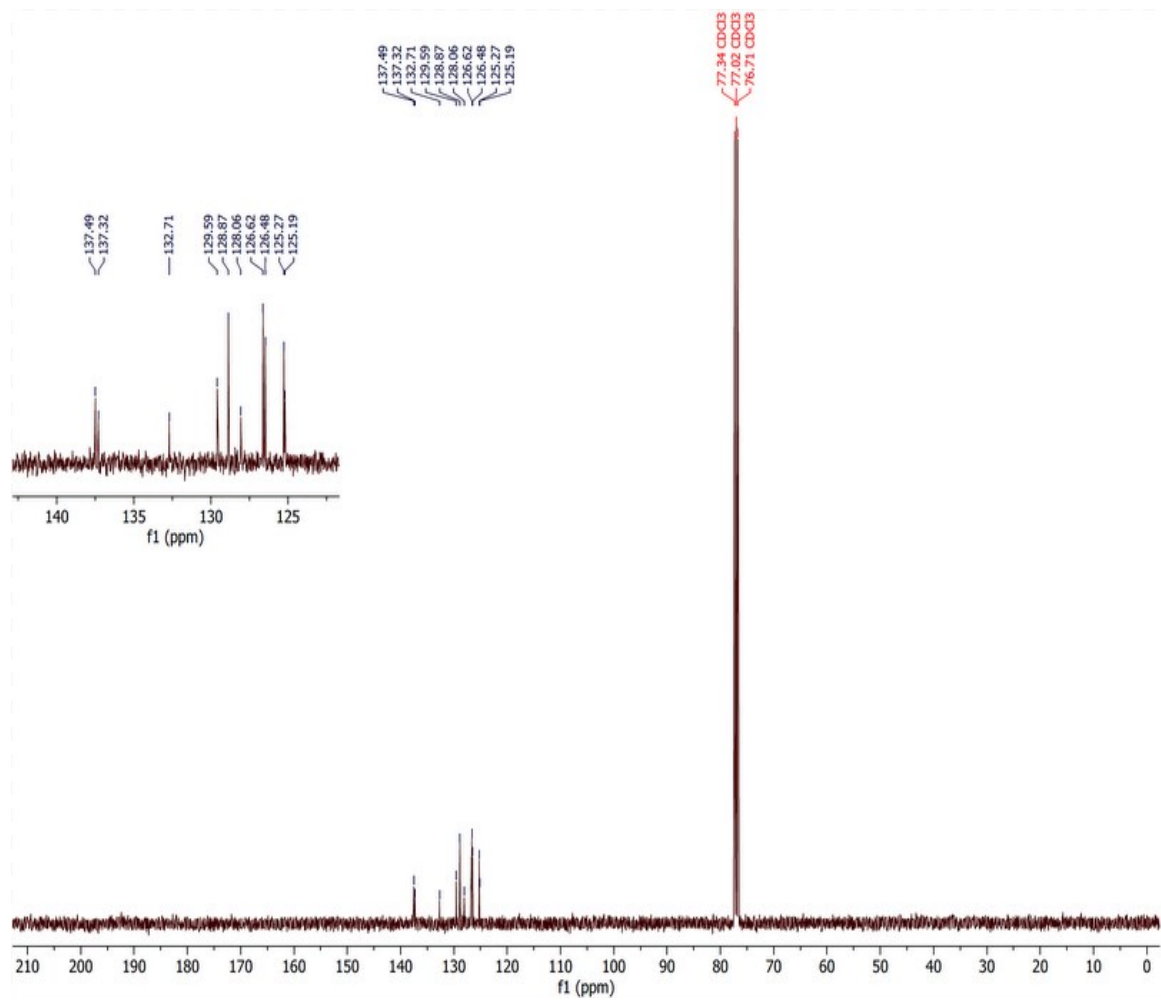

Figure 20.  $^{13}\text{C}$ -NMR for compound **10a**

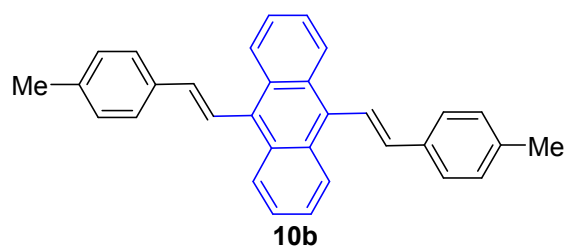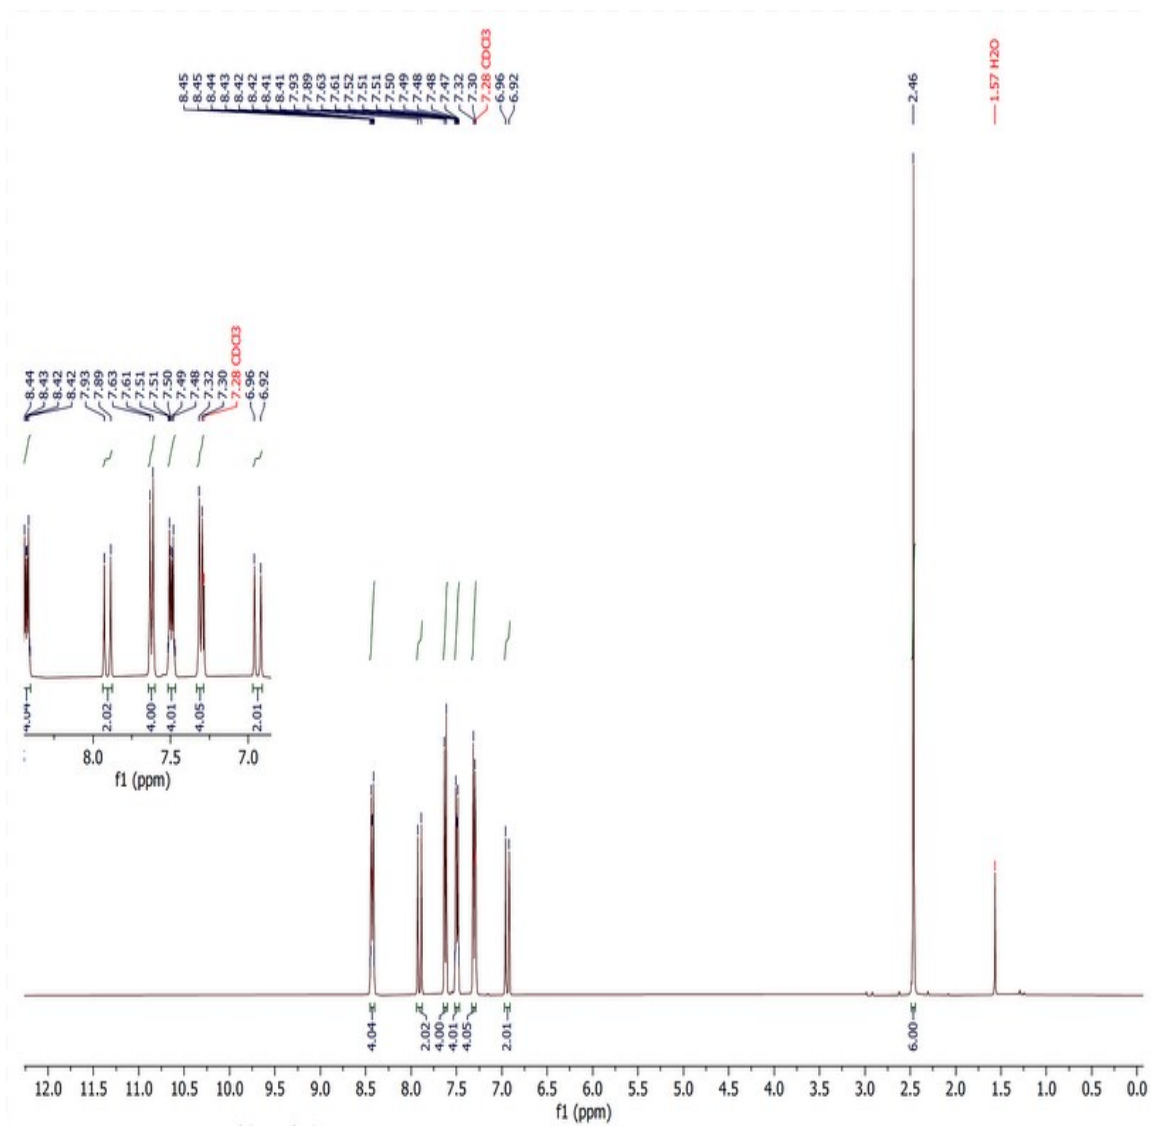

Figure 21.  $^1\text{H-NMR}$  for compound **10b**



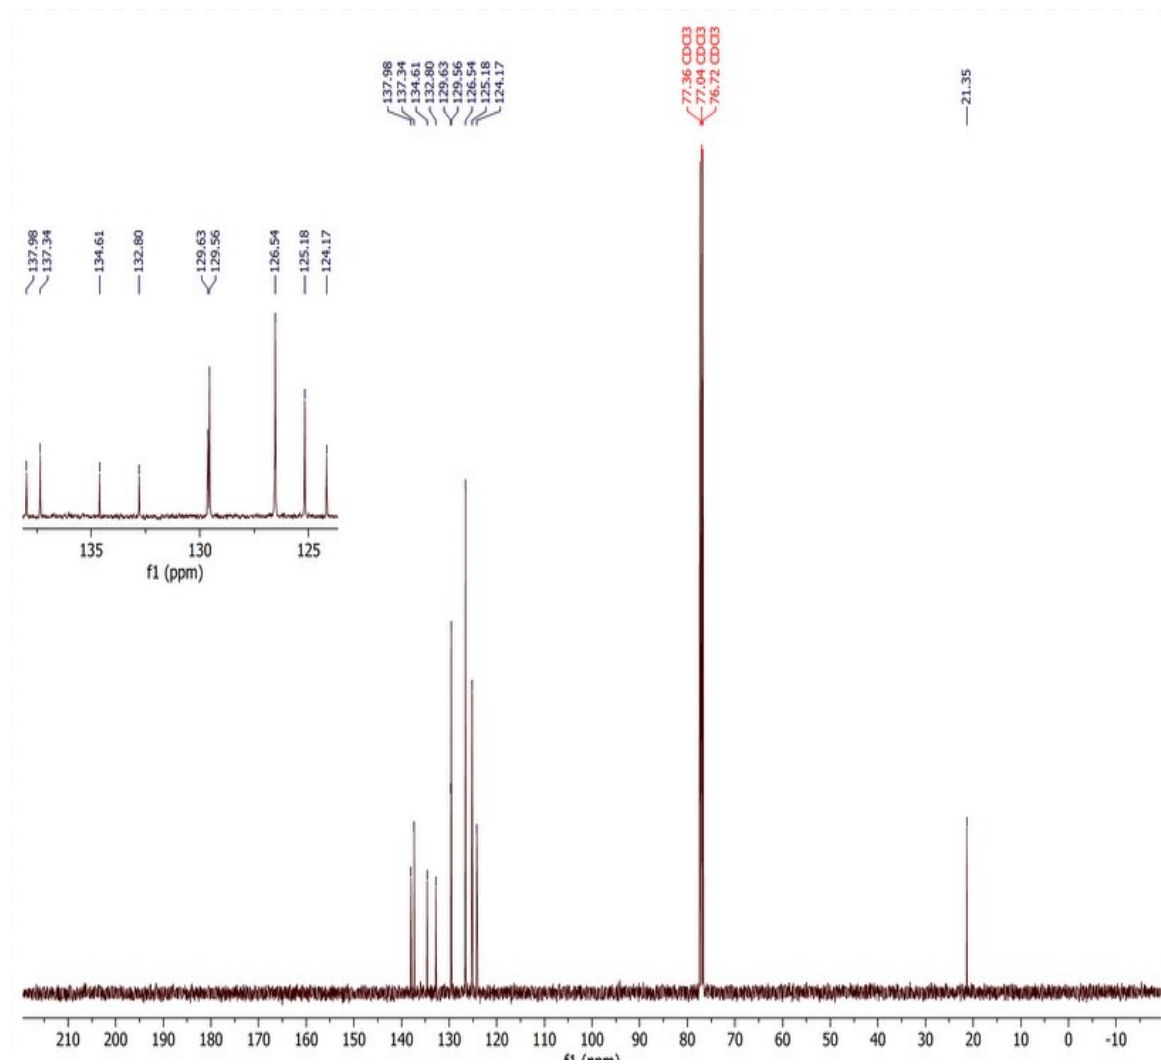

Figure 22.  $^{13}\text{C}$ -NMR for compound **10b**

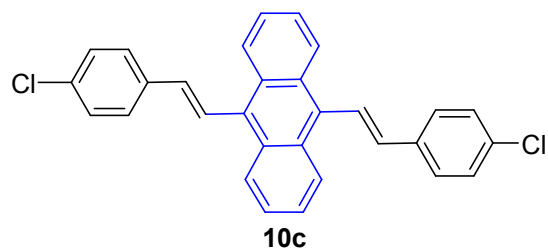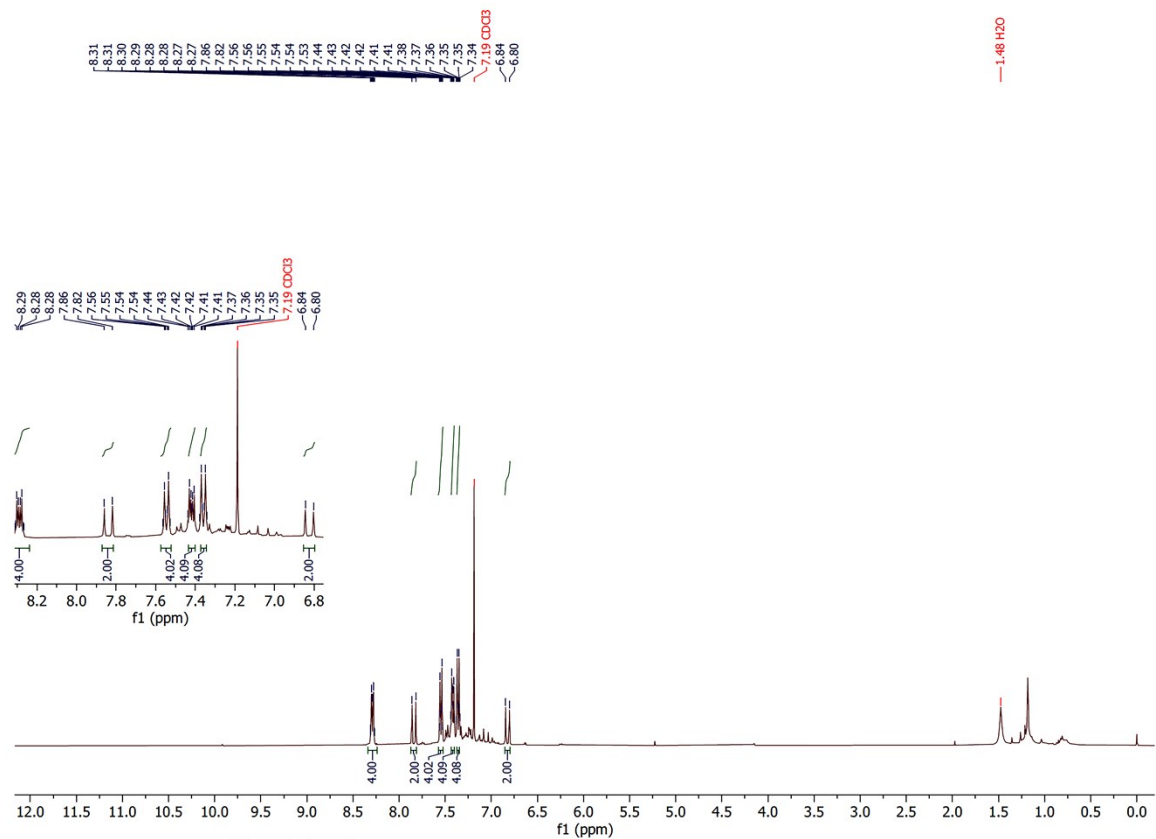

Figure 23. <sup>1</sup>H-NMR for compound **10c**

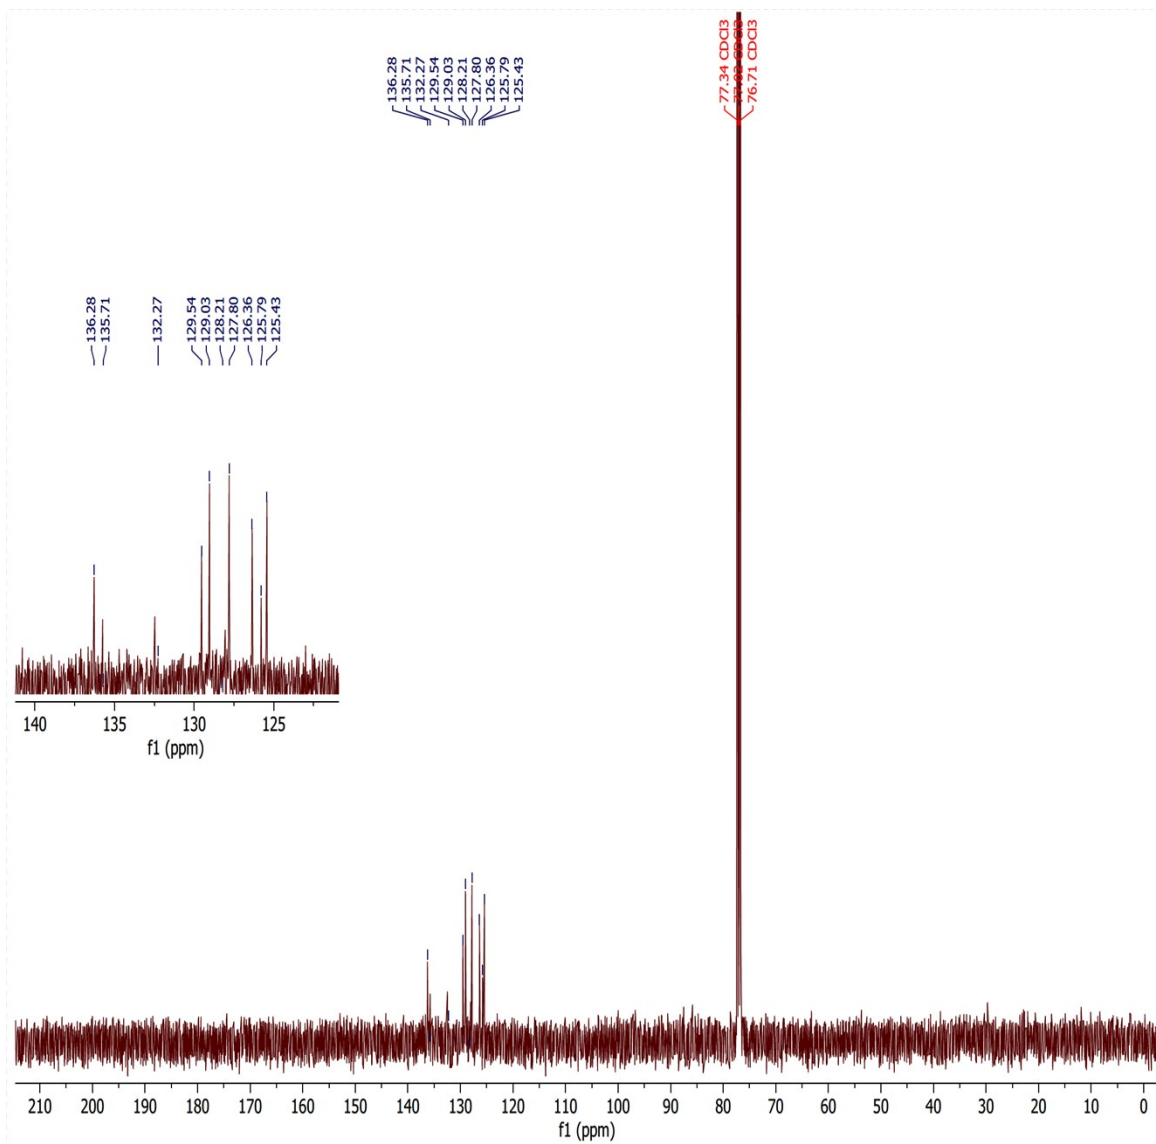

Figure 24. <sup>13</sup>C-NMR for compound **10c**

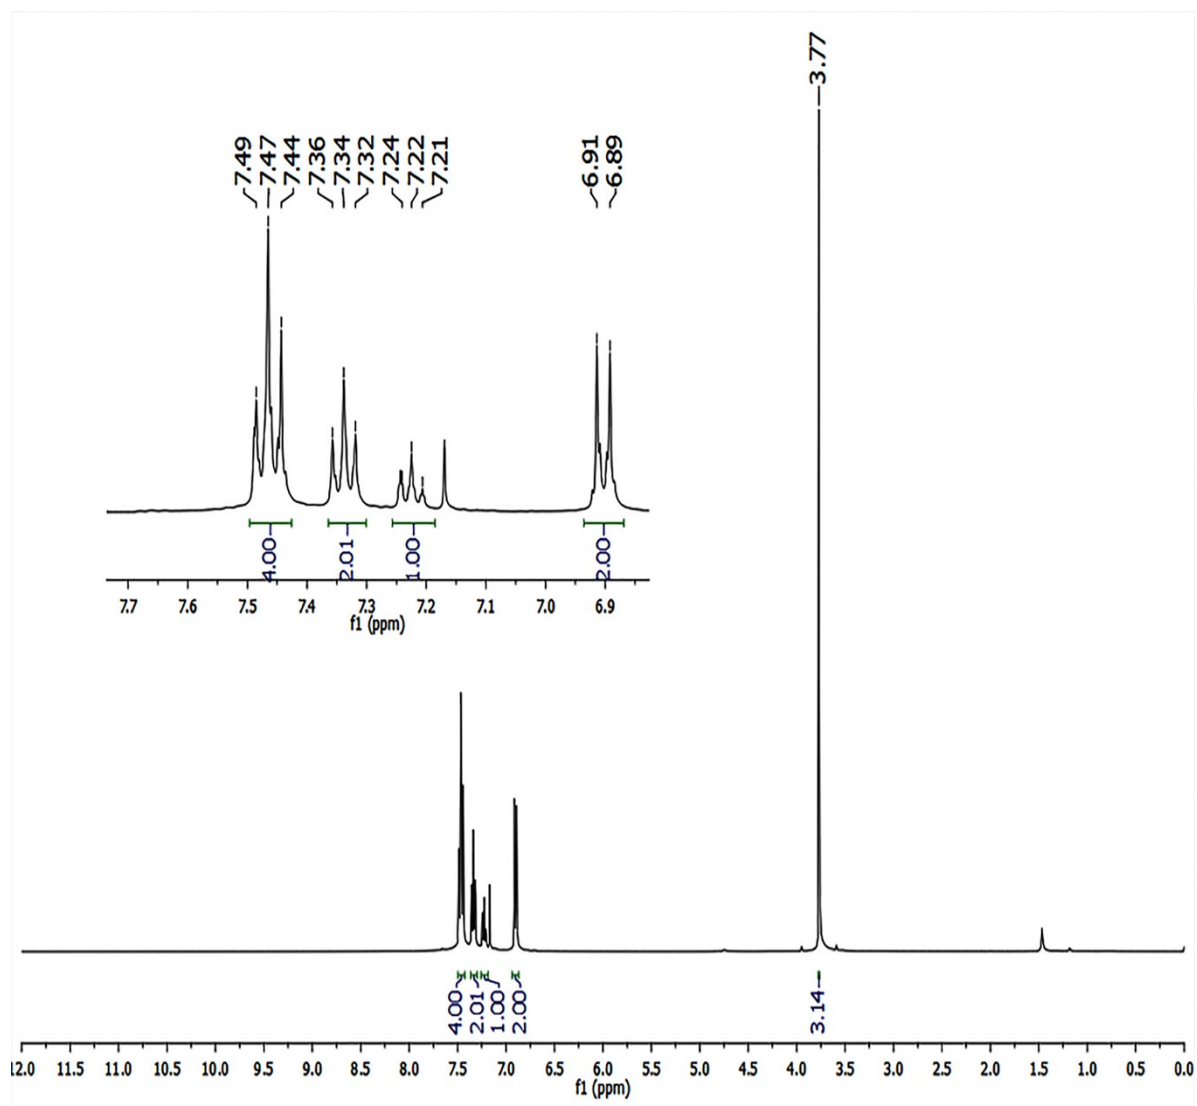

Figure 25. <sup>1</sup>H-NMR for compound **13**

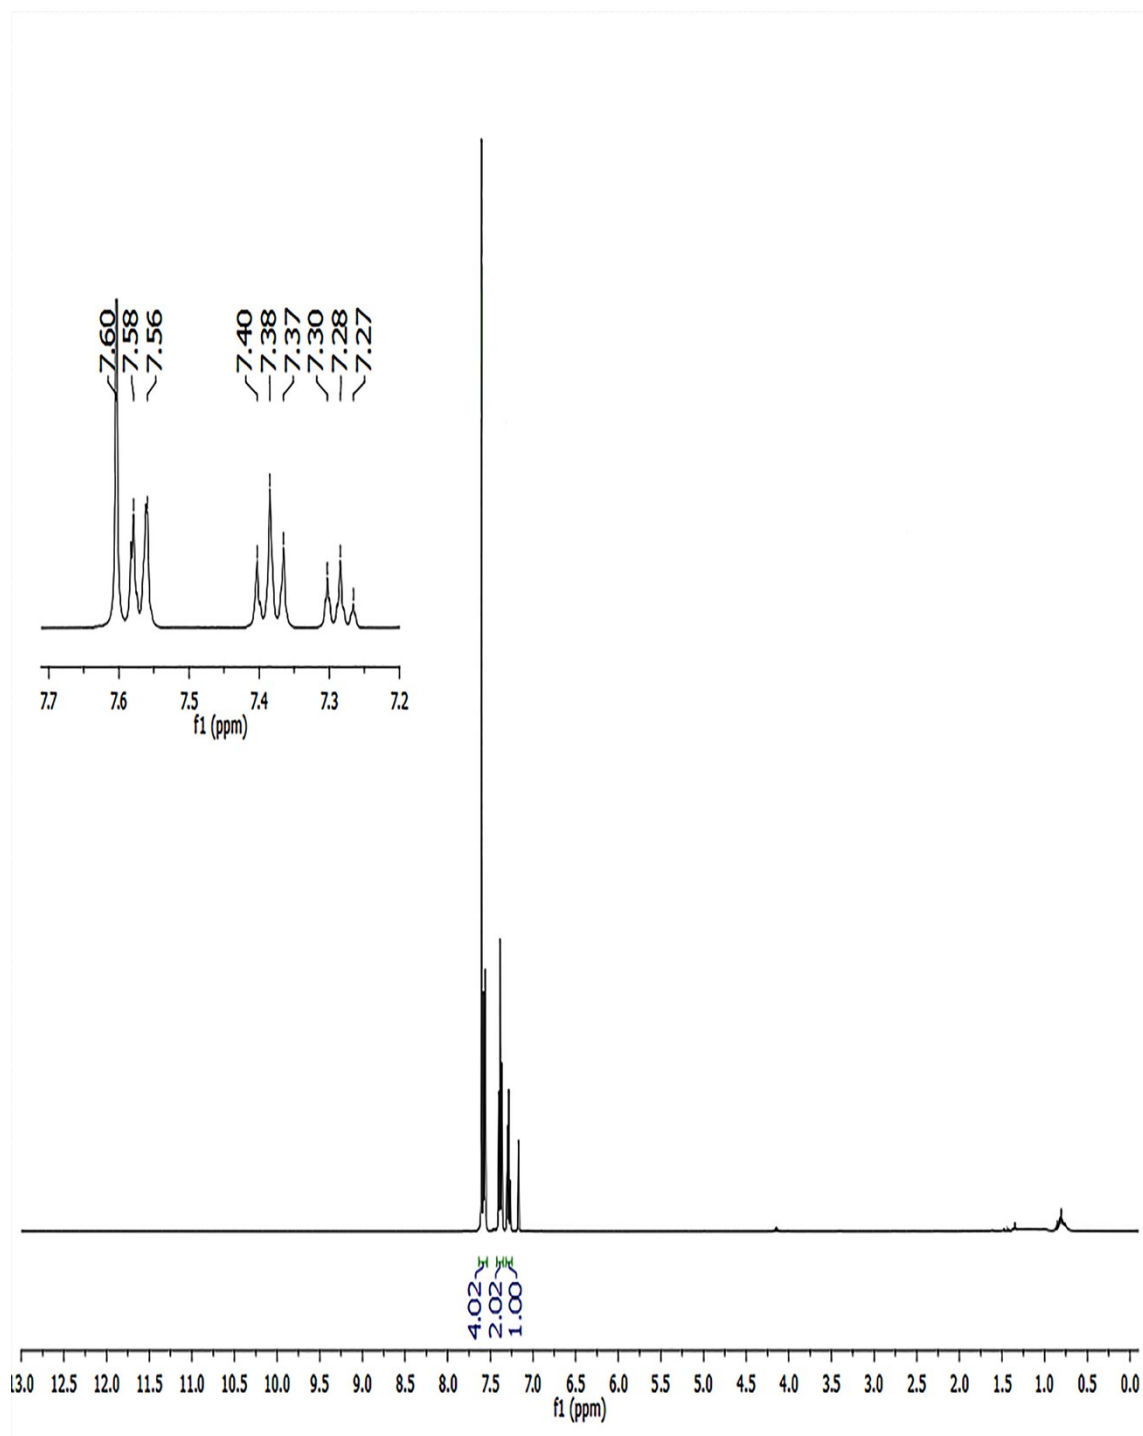

Figure 26.  $^1\text{H-NMR}$  for compound **14a**

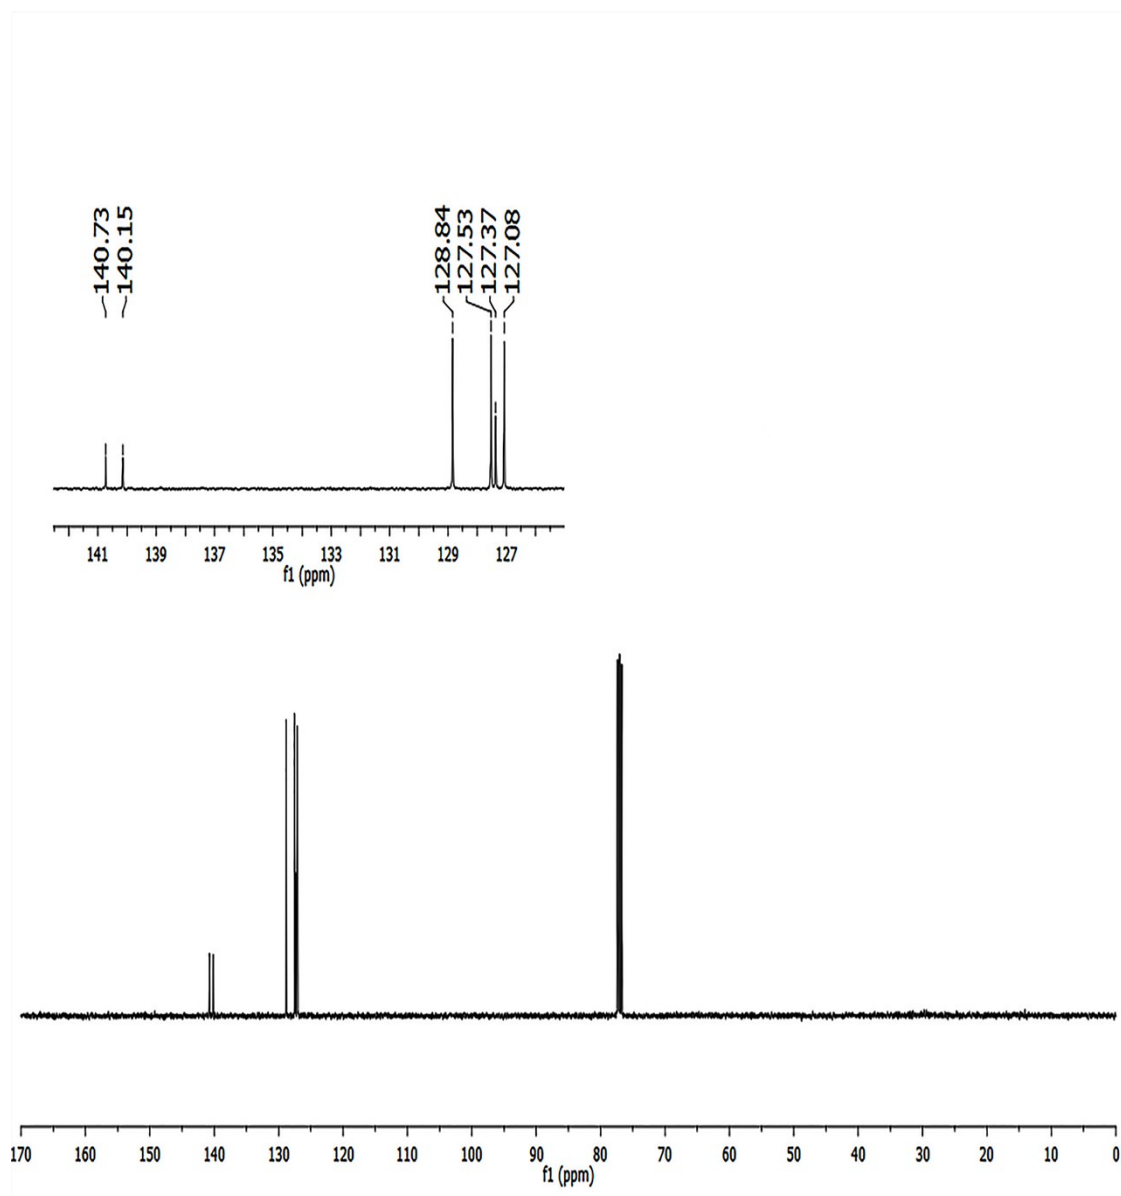

Figure 27.  $^{13}\text{C}$ -NMR for compound **14a**

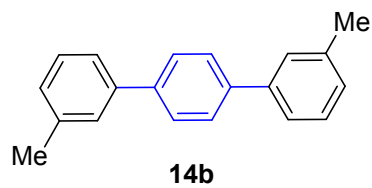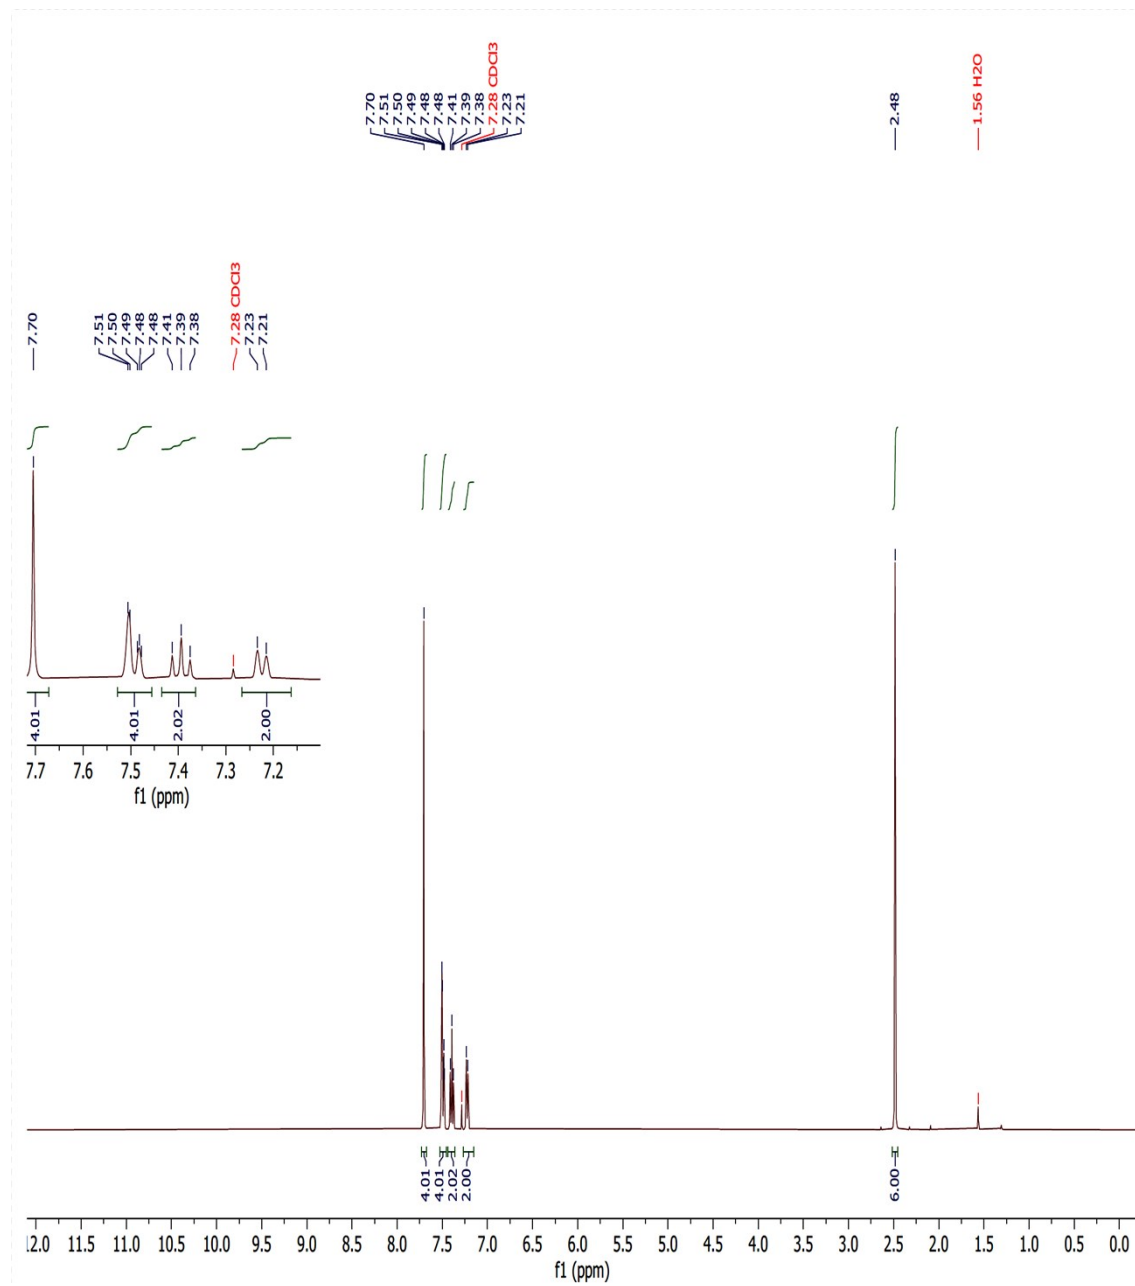

Figure 28. <sup>1</sup>H-NMR for compound **14b**

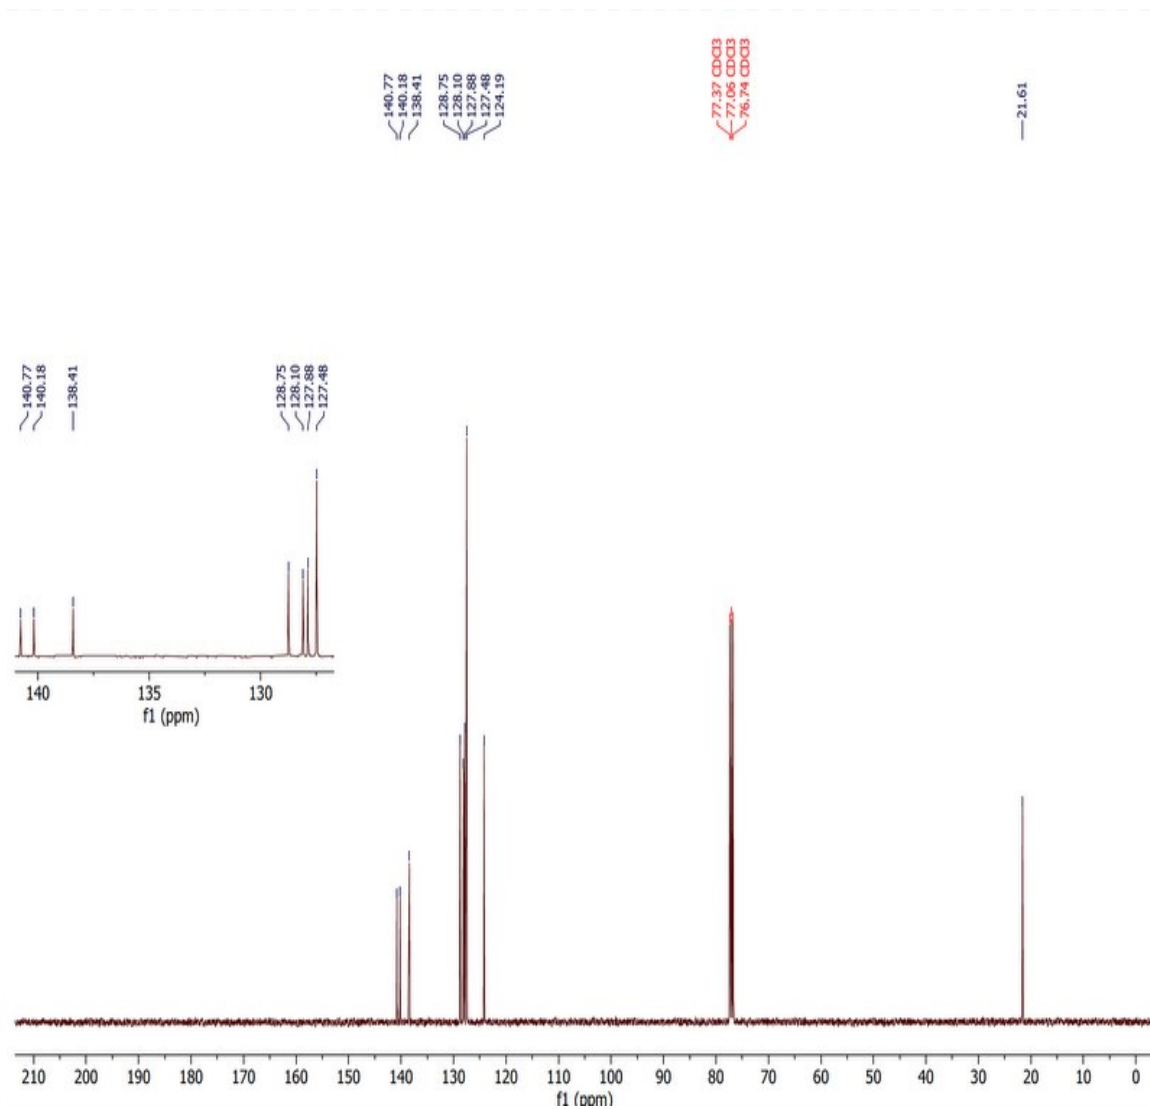

Figure 29.  $^{13}\text{C}$ -NMR for compound **14b**



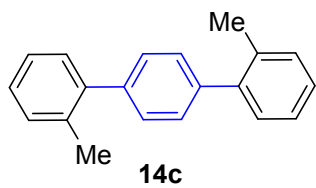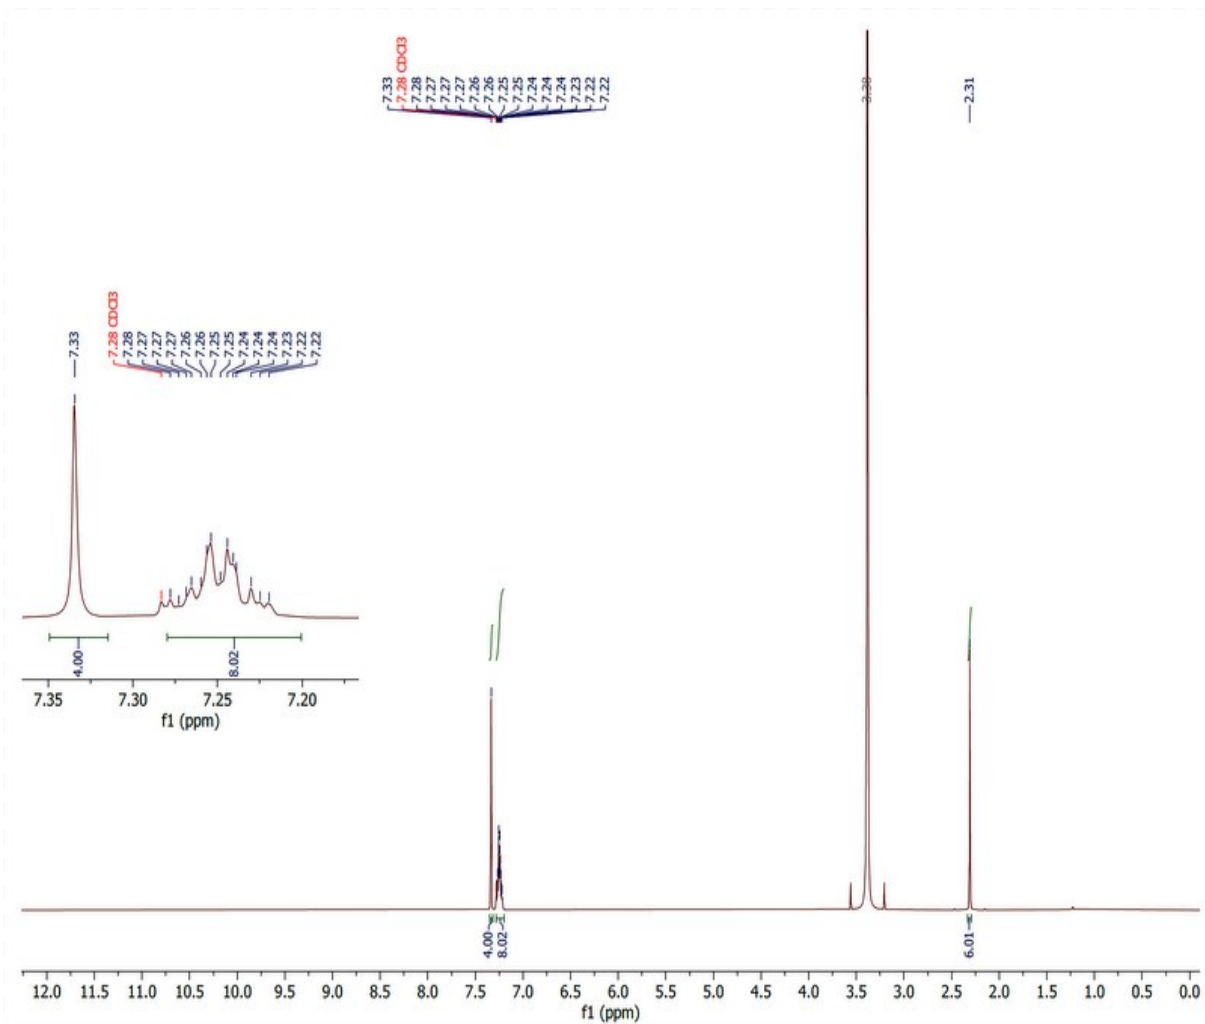

Figure 30. <sup>1</sup>H-NMR for compound 14c

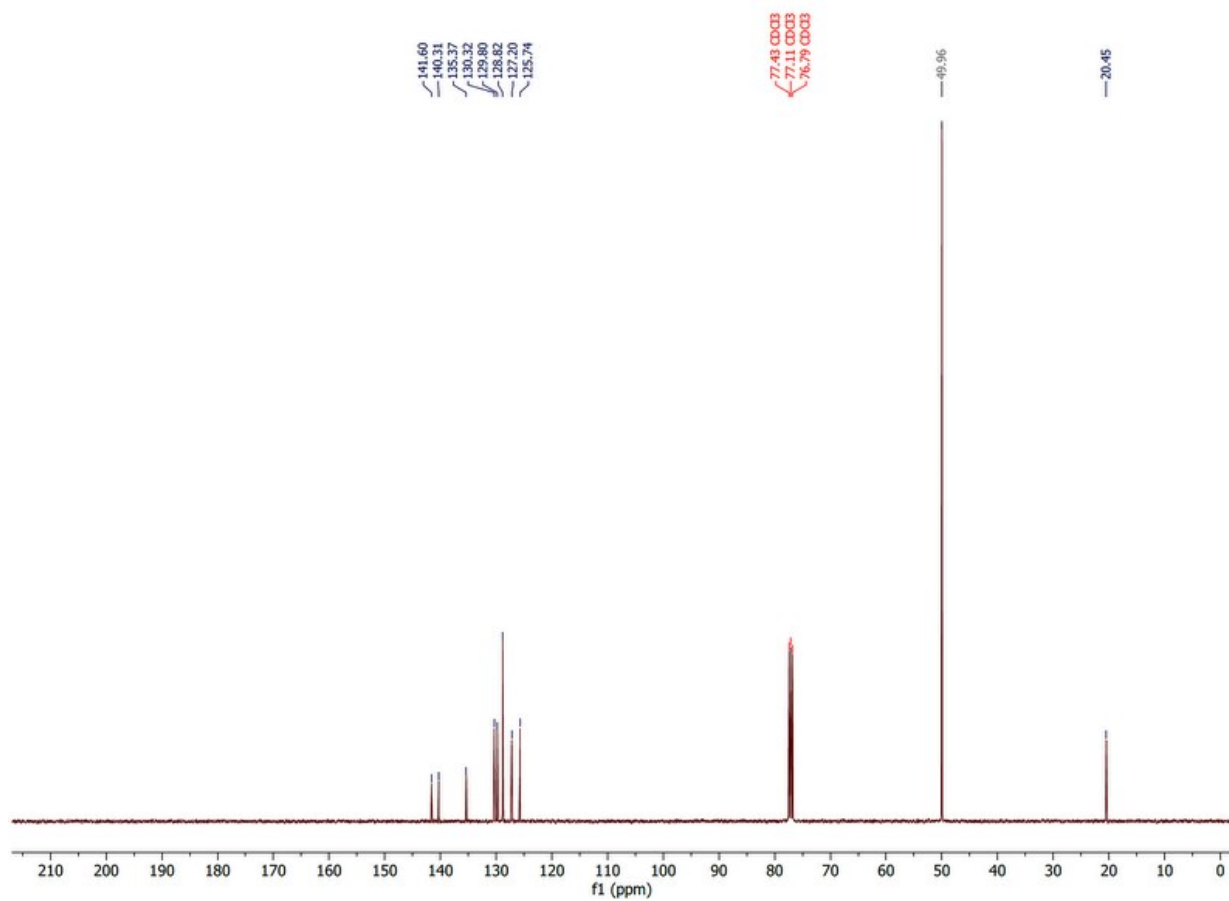

Figure 31.  $^{13}\text{C}$ -NMR for compound **14c**

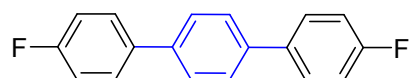

**14d**

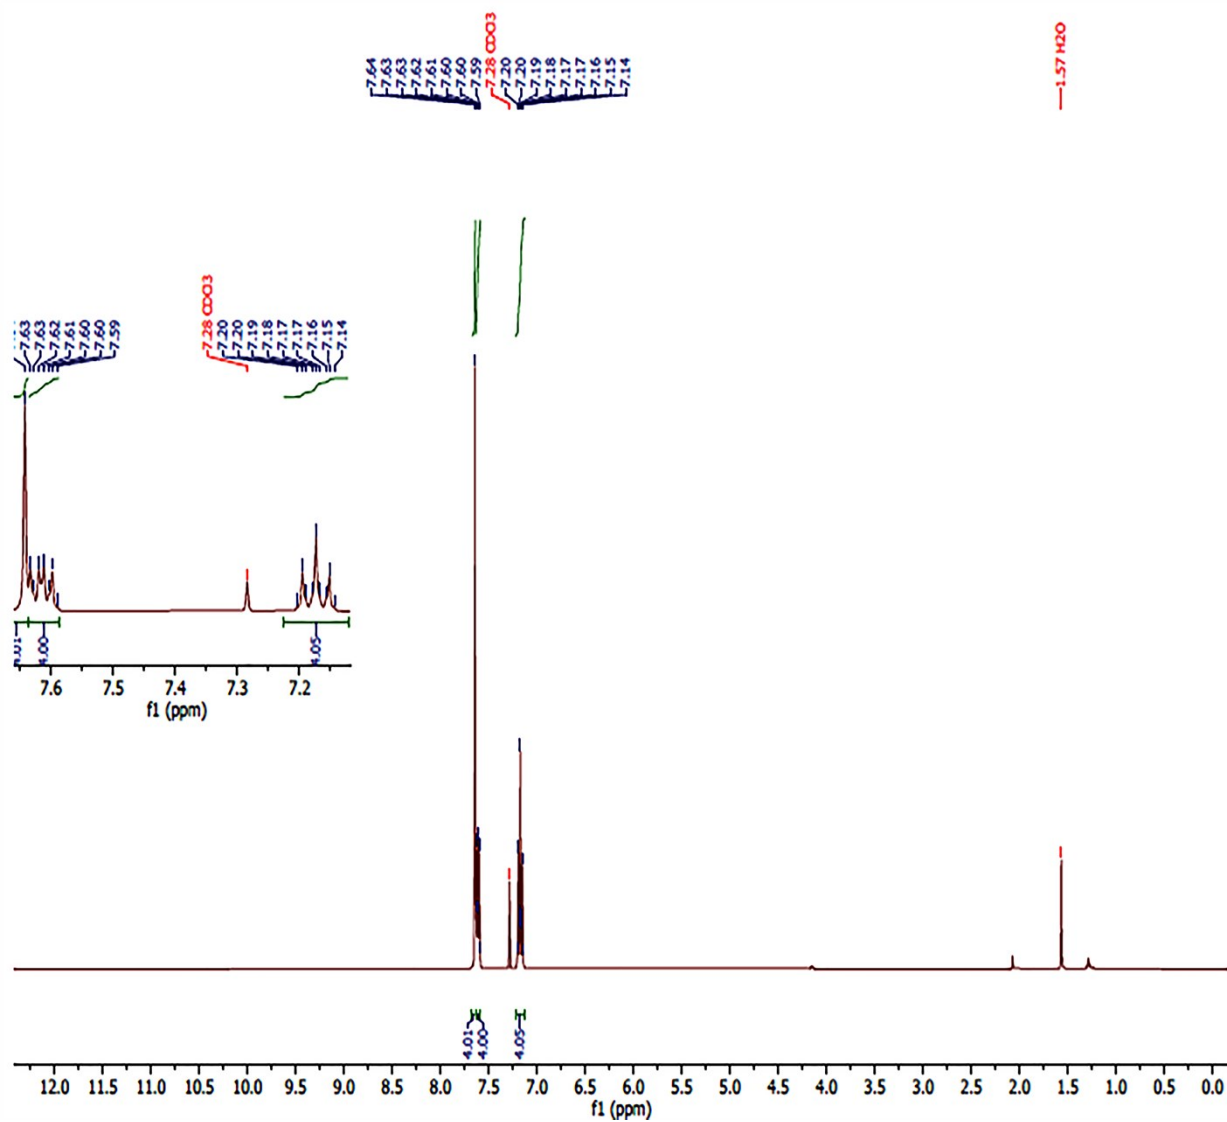

Figure 32. <sup>1</sup>H-NMR for compound **14d**

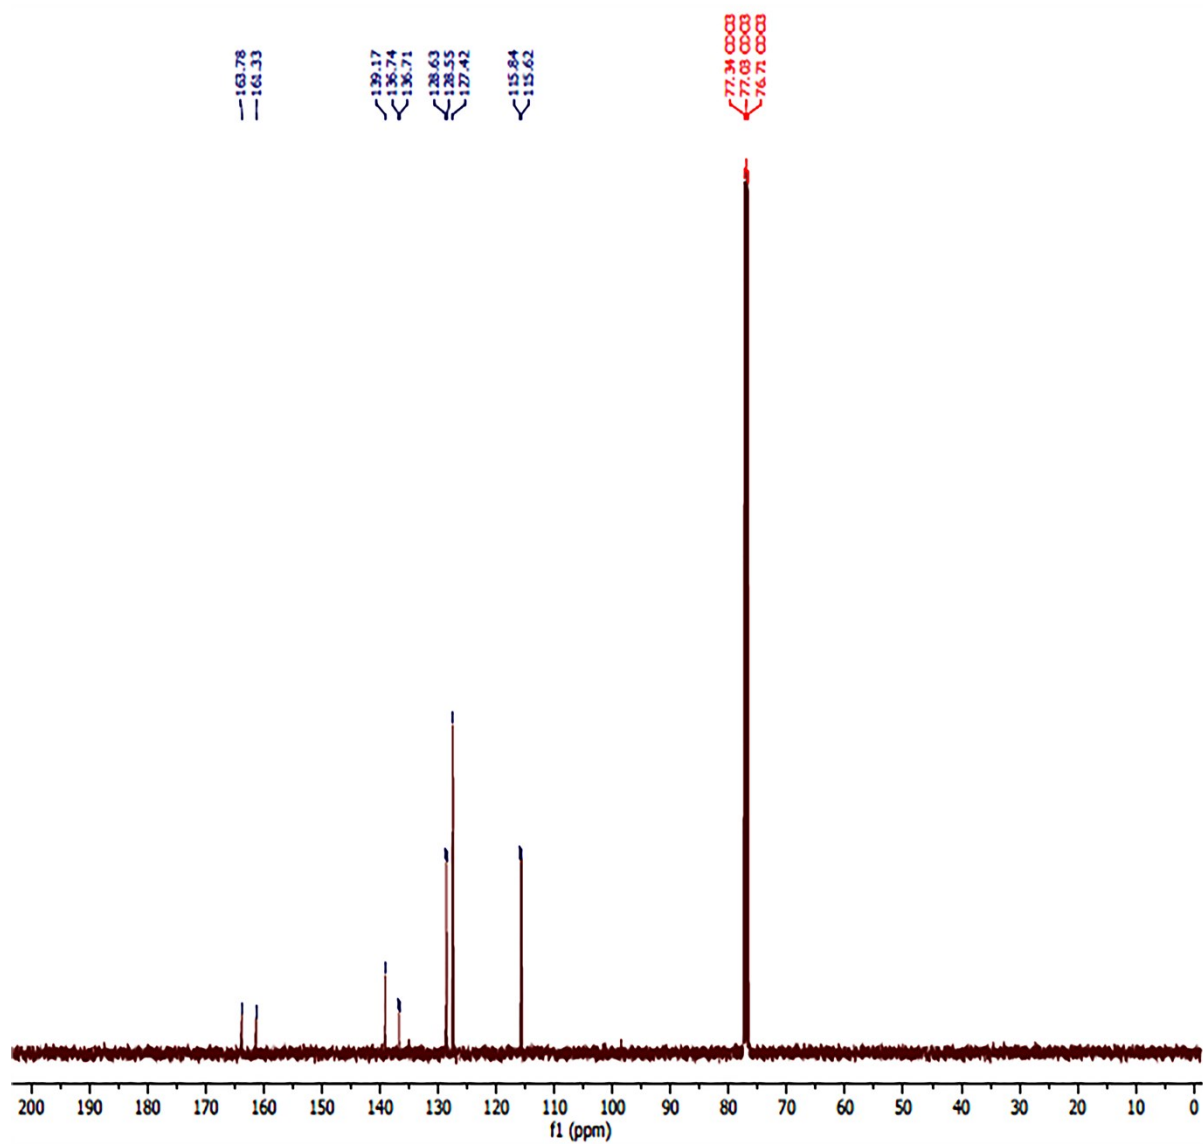

Figure 33.  $^{13}\text{C}$ -NMR for compound **14d**

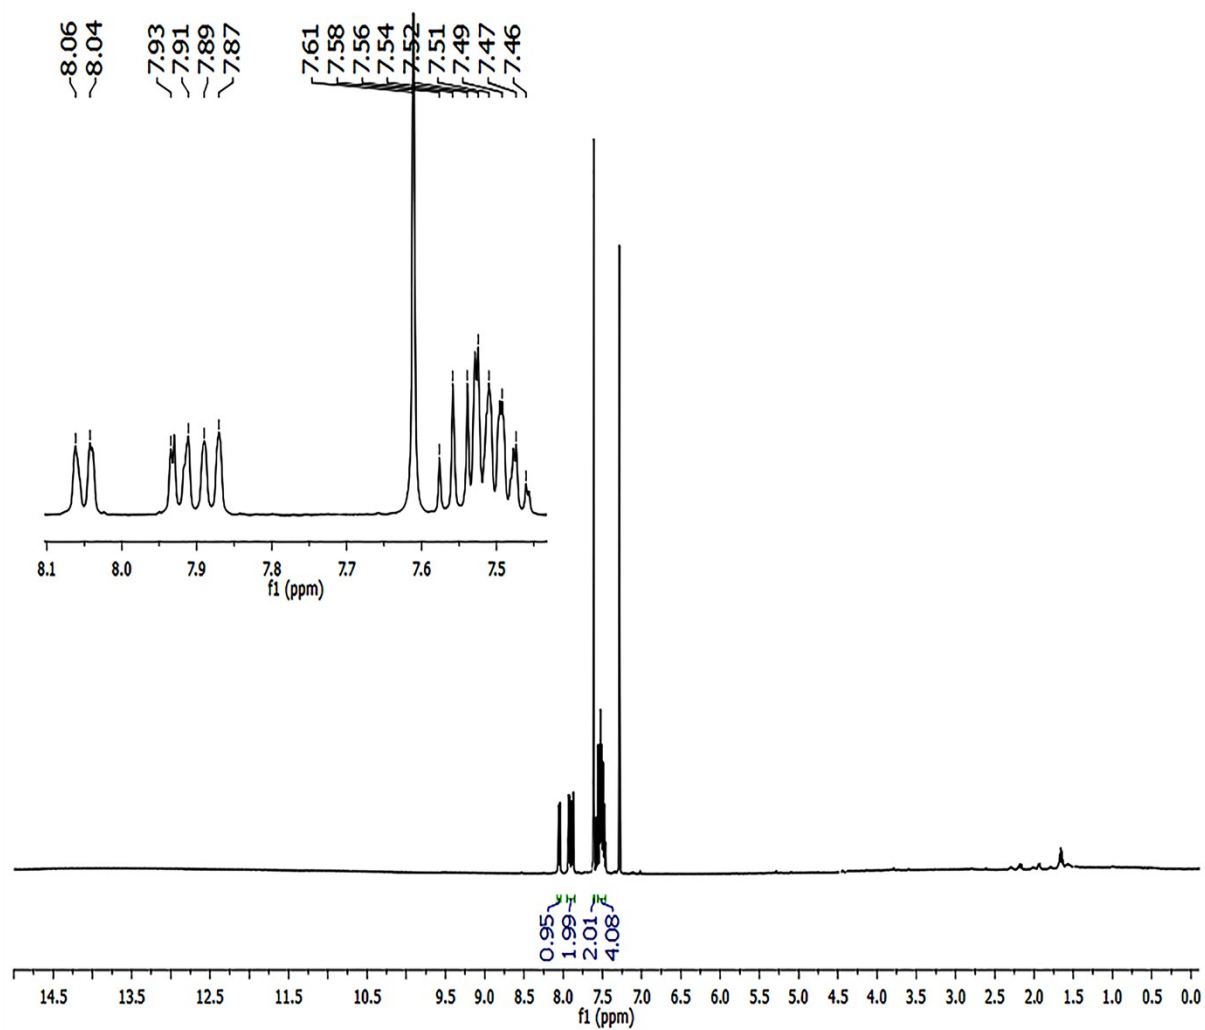

Figure 34.  $^1\text{H-NMR}$  for compound **14e**

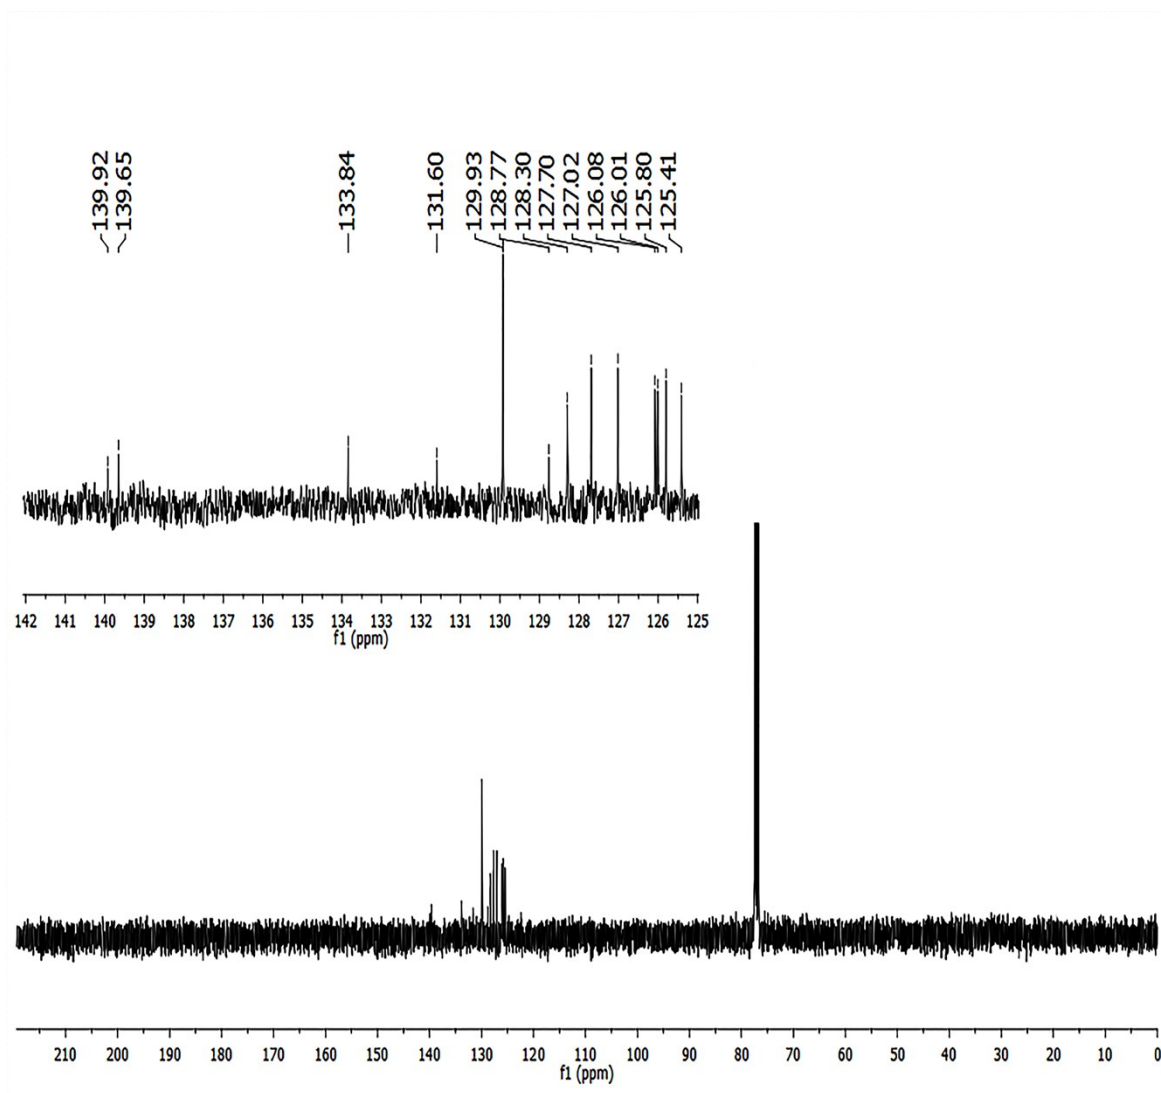

Figure 35. <sup>13</sup>C-NMR for compound 14e

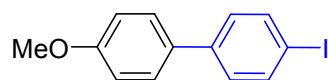

15

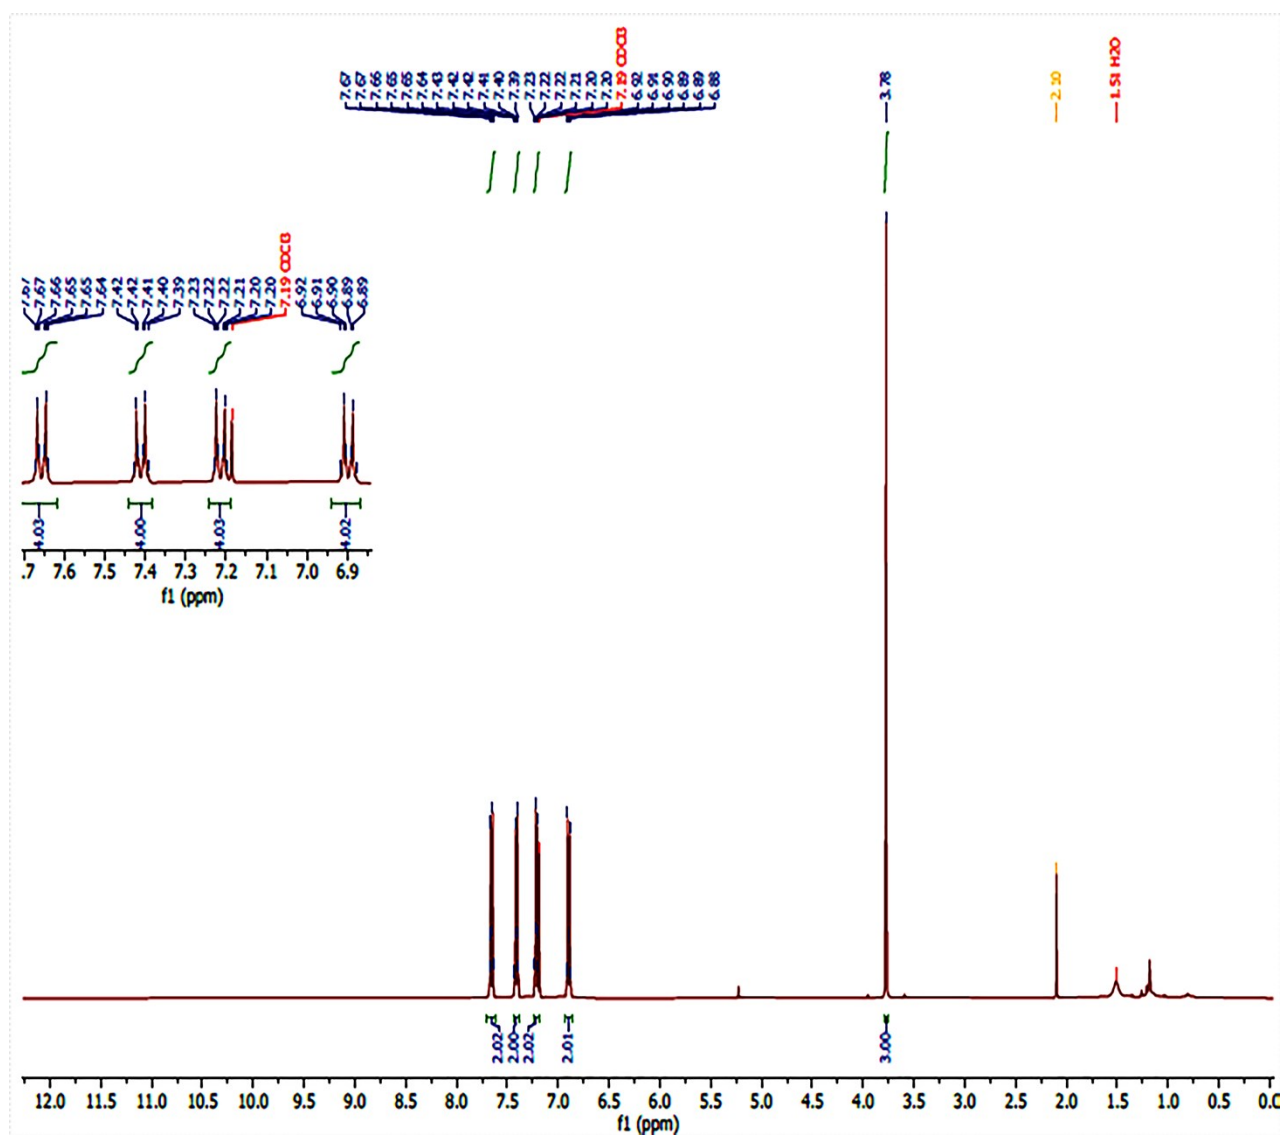

Figure 36. <sup>1</sup>H-NMR for compound 15

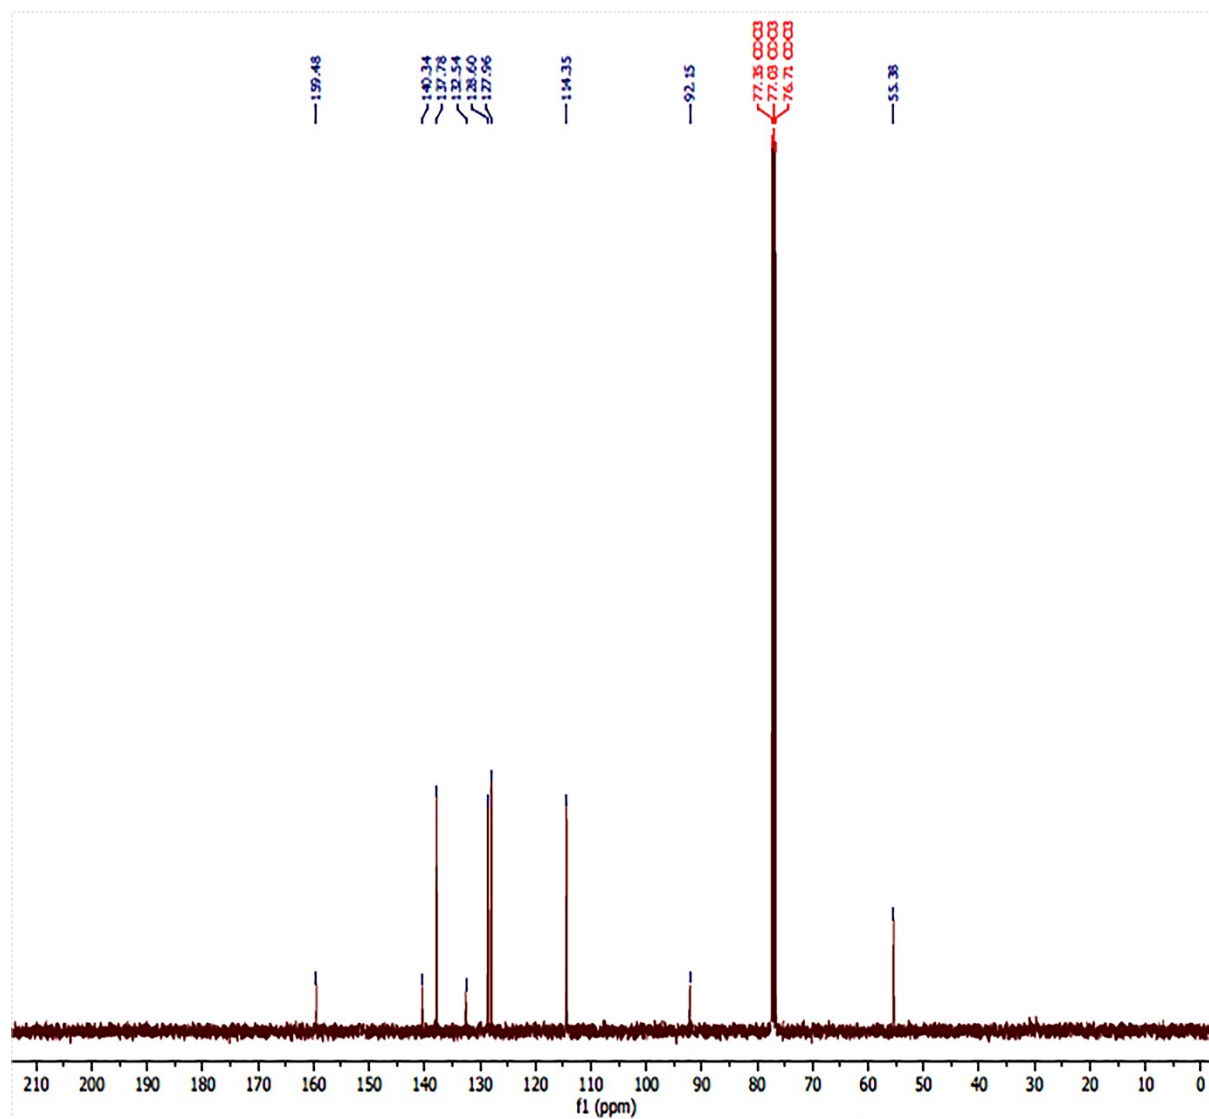

Figure 37. <sup>13</sup>C-NMR for compound 15
